# Supplementary material for: Hydroxychloroquine as pre-exposure prophylaxis for COVID-19 in healthcare workers: a randomized trial
Source: PubMed Central journal article supplement — medRxiv. 2020 Sep 18:2020.09.18.20197327. Preprint. [Version 1] doi: 10.1101/2020.09.18.20197327 (PMC7523161; doi:10.1101/2020.09.18.20197327), 2020-09-18
Supplement: 97484-2020.09.18.20197327-1.pdf [file 97484-2020.09.18.20197327-1.pdf]

## Appendix

### Table of Contents

|                                                                                                    |    |
|----------------------------------------------------------------------------------------------------|----|
| COVID PREP Team members                                                                            | 3  |
| Authorship Contributions                                                                           | 3  |
| Methods S1. Additional Exclusion Criteria                                                          | 5  |
| Methods S2. Covid-19 Clinical Case Definition                                                      | 5  |
| Methods S3. Hydroxychloroquine Drug Concentrations                                                 | 7  |
| Methods S4. Additional Supplemental Methods                                                        | 7  |
| Figure S1. Map of Enrollment by State                                                              | 11 |
| Figure S2. Enrollment by Study Week                                                                | 12 |
| Supplemental Table 1. Baseline Demographics                                                        | 13 |
| Supplemental Table 2. Baseline Risk for Covid-19                                                   | 15 |
| Supplemental Table 3. Primary Event by Symptoms and PCR Testing                                    | 17 |
| Figure S3. Kaplan Meier Estimate of Time to Confirmed PCR Positive Covid-19 Infection              | 18 |
| Figure S4. Kaplan Meier Estimate of Time to Covid-19 Compatible Symptoms                           | 19 |
| Figure S5. Distribution of Symptoms for Covid-19 Compatible Cases Designated as Confirmed Covid-19 | 20 |
| Figure S6. Distribution of Symptoms for Covid-19 Compatible Cases Designated as Probable Covid-19  | 21 |
| Figure S7. Distribution of Symptoms for Covid-19 Compatible Cases Designated as Possible Covid-19  | 24 |
| Figure S8. Percentage of Participants Reporting Side Effects by Survey Week                        | 26 |
| Supplemental Table 4. Reported Side Effects                                                        | 27 |
| Supplemental Table 5. GI Side Effects by Week                                                      | 28 |

|                                                                                                                          |    |
|--------------------------------------------------------------------------------------------------------------------------|----|
| Supplemental Table 6. Stomach Side Effects by Week                                                                       | 28 |
| Figure S9. Percentage of Participants Reporting Full Medication Adherence by Survey Week                                 | 29 |
| Supplemental Table 7. Demographics of Participants in Hydroxychloroquine Sub-study                                       | 30 |
| Figure S10. Hydroxychloroquine Drug Concentrations                                                                       | 30 |
| Supplemental Table 8. Secondary Outcomes                                                                                 | 31 |
| Supplemental Table 9. Combined Hydroxychloroquine Arms Compared to Placebo                                               | 32 |
| Supplemental Table 10. Subgroup Analysis of Risk of New Covid-19 Compatible Illness with Hydroxychloroquine Once Weekly  | 33 |
| Figure S11. Forest Plot of <i>A priori</i> Identified Subgroups, Hydroxychloroquine Once Weekly                          | 35 |
| Supplemental Table 11. Subgroup Analysis of Risk of New Covid-19 Compatible Illness with Hydroxychloroquine Twice Weekly | 36 |
| Figure S12. Forest Plot of <i>A priori</i> Identified Subgroups, Hydroxychloroquine Twice Weekly                         | 38 |
| Sensitivity Analyses                                                                                                     | 39 |
| Supplemental Table 12. Participant Guess of Treatment Assignment                                                         | 41 |
| References                                                                                                               | 42 |

**COVID PREP team members** (listed alphabetically)

Mahsa Abassi, DO. University of Minnesota, Minneapolis, MN.  
Andrew Balster, MD. Oregon Health & Science University, Portland, OR.  
Lindsey B. Collins, BSc. University of Minnesota, Minneapolis, MN.  
Glen Drobot, MD. University of Manitoba, Winnipeg, Manitoba.  
Douglas S. Krakower, MD. Beth Israel Deaconess Medical Center, Boston, MA.  
Sylvain A. Lothar, MD. University of Manitoba, Winnipeg, Manitoba.  
Dylan S. MacKay, PhD. University of Manitoba, Winnipeg, Manitoba.  
Cameron Meyer-Mueller, BA. University of Minnesota, Minneapolis, MN.  
Stephen Selinsky, MD. University of Minnesota, Minneapolis, MN.  
Dayna Solvason. The George and Fay Yee Centre for Healthcare Innovation, Winnipeg, Manitoba.  
Ryan Zarychanski, MD, MSc. University of Manitoba, Winnipeg, Manitoba.  
Rebecca Zash, MD. Beth Israel Deaconess Medical Center, Boston, MA

**Collaborators**

Drug assay development and performance: James Fisher  
Concept advisors: Archana Bhaskaran  
Logistical Support: Kristen Moran, Alek Lefevbre, Izabella Supel, Carmen Tse, Hongru Ren, Fiona Vickers, Jason Zou  
Pharmacy Support: Darlette Luke, PRISM Research Inc., Halyna Ferens, Beata Kozak

**Authorship Contributions:**

RR and DRB conceived of the trial. RR wrote the clinical protocol with the assistance of SML, CPS, DRB, MRN, JB, BR, PL and IM, and statistical input from ASB, NWE, and KHH. LJM collaborated and adapted the study for Canadian sites with input from DSM, DS and TCL and. KHH, ASB, and NWE conducted the statistical analyses, with the analysis being guaranteed by KHH. ASB developed the REDCap database with help from MFP, KAP, SML, and CPS. ASB maintained the database. TCL and EGM adapted the database in Canada. MLA, CPS, AAN, MFP, KAP, ECO, DAW, LJM, and RR did participant follow-up. Advertising and outreach were

done by SD, DRB, RR, SML, CPS, MFP, ASB, AAN, ECO, PL, DAW, LJM, SAL, DSM, GD, and RZ. RR, CPS and SML did case adjudication. Hydroxychloroquine drug levels sub-study was conceived by MRN, RR, DK, RZ, and levels were run by MRN. RR wrote the first draft of the manuscript and is the overall study guarantor with help from SML, DRB, CPS, MFP, KAP, ECO, AAN, and DAW. All authors reviewed and revised and approved the final version of the manuscript. The FDA Investigational New Drug sponsor is RR.

Steve Kirsch, David Baszucki and Jan Ellison Baszucki, the Rainwater Charitable Foundation, the Alliance of Minnesota Chinese Organizations, the Minnesota Chinese Chamber of Commerce, and the University of Minnesota provided funding but did not have a role in protocol development or monitoring. Rising Pharmaceuticals provided the hydroxychloroquine tablets.

## **Methods S1. Additional Exclusion Criteria**

Additional exclusion criteria included, prior allergy or adverse reaction to chloroquine or hydroxychloroquine, known QT prolongation, G6PD deficiency, porphyria, prior retinal eye disease, chronic kidney disease (stage 4, 5, or dialysis), weight <40kg.

Current use of the following medications was contraindicated: hydroxychloroquine, chloroquine, flecainide, amiodarone, digoxin, procainamide, propafenone, artemether, lumefantrine, mefloquine, tamoxifen, or methotrexate.

In Canada, additional exclusions requested by Health Canada were: pregnancy, breastfeeding, severe diarrhea or vomiting, known cirrhosis with history of encephalopathy or ascites, current use of systemic chemotherapy, residing in a remote location not serviced by courier, ventricular arrhythmia, or history of sudden cardiac death, or QT prolonging medicines (dapson, dofetilide, sotalol, levofloxacin, ciprofloxacin, moxifloxacin, azithromycin, clarithromycin, erythromycin, ketoconazole, itraconazole, amitriptyline, citalopram, desipramine, escitalopram, imipramine, doxepin, fluoxetine, sertraline, bupropion, venlafaxine, haloperidol, droperidol, lithium, quetiapine, thioridazine, ziprasidone, methadone, or current use of sumatriptan or zolmitriptan if not prescribed “as needed”).

## **Methods S2. Covid-19 Clinical Case Definition**

Clinical case definition of Covid-19 was defined on April 5, 2020 by the US Council of State and Territorial Epidemiologists.<sup>1</sup>

Clinical Criteria for Reporting include at least two of the following symptoms:

- Fever
- Chills
- Rigors
- Myalgia
- Headache
- Sore throat
- New olfactory and taste disorders

OR at least one of the following symptoms:

- Cough
- Shortness of breath, OR
- Difficulty breathing

OR severe respiratory illness with at least one of the following:

- Clinical or radiographic evidence of pneumonia, OR
- Acute respiratory distress syndrome (ARDS)

AND No alternative more likely diagnosis.

Participants meeting the above case definition are classified as “Probable” Covid-19 cases.

#### Epidemiological Linkage Criteria for Reporting

In a person with clinically compatible symptoms with one or more of the following exposures in the 14 days before onset of symptoms:

- Travel to or residence in areas with sustained, ongoing community transmission of SARS-CoV-2; OR
- Close contact with a person diagnosed with Covid-19; OR
- Member of a risk cohort as defined by public health authorities during an outbreak

Participants were all considered to have epidemiological linkage given the inclusion criteria of being a high-risk healthcare worker with direct contact with Covid-19 patients. Thus, with this epidemiologic linkage, have one compatible symptom is defined as a probable case, per these guidelines. In our study, we defined these participants with one compatible symptom as ‘possible’ Covid-19.

### **Methods S3. Hydroxychloroquine drug concentrations**

Participants who consented to the pharmacokinetic sub study were mailed Neoteryx® volumetric absorbed microsampling kits. Participants were provided detailed instructions on sample collection (<https://www.neoteryx.com/home-blood-blood-collection-kits-dried-capillary-blood>) and asked to fill two 10 microliter capillary tubes and return in provided packaging. Participants were asked to collect their sample immediately prior to their next scheduled dose of medication to provide consistency between participants and to evaluate trough concentrations. Participants self-reported time of collection and time of last dose of study medication prior to sample collection. Upon receiving the samples in the laboratory, they were stored in a cold room (4°C) with desiccants until sample analysis. Hydroxychloroquine has demonstrated stability greater than three weeks at room temperature.

Hydroxychloroquine concentrations were measured in dried blood similar to methods previously published.<sup>2</sup> Briefly, the tips of the capillary tubes containing the dried blood were removed and placed in microcentrifuge tubes along with internal standard solution. Samples were then vortexed before protein precipitation. Samples were then centrifuged (with tip remaining) to separate supernatant. Standards and quality control samples were prepared in an identical manner. Quantification of hydroxychloroquine was performed using high-performance liquid chromatograph coupled with a triple quad mass spectrometer. The assay was validated over the range of 50-2000 ng/mL with 3-day accuracy and precision  $\leq 15\%$ . Stability tests with samples stored at ambient temperature have confirmed stability up to three weeks post-collection.

## **Methods S4. Supplemental Methods**

### *Hydroxychloroquine dosing*

We hypothesized, based on pharmacokinetic simulations that twice-weekly dosing would be effective;<sup>3</sup> we also studied the well-established once weekly chemoprophylaxis dose due to its track record of safety and adherence as well as its deployment in non-experimental settings.<sup>4,5</sup>

### *Participants*

On April 22, 2020 eligibility criteria expanded to include healthcare personnel working in congregate care facilities with Covid-19 cases (e.g., nursing homes or assisted living facilities) and urgent care. Pregnancy or breastfeeding were not exclusion criteria in the USA.

### *Setting*

Other Canadian provinces pursued IRB approvals, but approvals were not completed by the time the trial closed.

### *Study Assessments*

Participants hospitalized or pregnant at study termination had additional surveys administered to capture relevant longitudinal outcomes.

A pre-specified list of common hydroxychloroquine side effects and Covid-19 compatible symptoms were provided along with a free-text option where participants could specify side effects and/or symptoms experienced outside of those pre-specified. Participants who were non-responsive to follow-up surveys received email reminders, text messages, and phone calls to ascertain their outcomes. When all of these methods were unsuccessful, emergency contacts provided by the enrollee were contacted to establish the participant's vital status.

### *Randomization*

Randomization occurred at research pharmacies in Minneapolis for participants in the United States and in Montreal for participants in Canada. The trial statisticians generated a



permuted block randomization sequence using variably sized blocks of two, four, and eight. A research pharmacist sequentially assigned participants. Treatment assignments were concealed from investigators and participants; the pharmacies were the only entities with access to the randomization sequence. Blinded hydroxychloroquine sulfate or placebo was dispensed and shipped over two days to participants by commercial courier. Placebo tablets (folic acid 400mcg in USA, 1000mcg in Canada) were similar but not identical in appearance.

### *Sample Size*

We assumed loss to follow up of 5% in the treatment groups and 15% in the placebo groups, assuming healthcare workers might be able to discern hydroxychloroquine from placebo. We expected 117 Covid-19 events over 12 weeks.

Given the incidence of Covid-19 transmission to high-risk healthcare workers was unknown at the time of study initiation, we also planned for an *a priori* sample size re-estimation at the time of the first data and safety monitoring board (DSMB) review based on the observed event rate in the control group.

### *Statistical Methods*

As sensitivity analyses, we included these participants, or excluded participants who became symptomatic during week one of the trial. As a secondary analysis, we planned to combine hydroxychloroquine arms and compare to placebo. *A priori* specified subgroups included: age, sex, and geographic region of exposure. We also planned to compare i) workers with a confirmed high-risk exposure event (one or more episodes of performing an aerosol-generating procedure with inadequate PPE) to workers without a confirmed high-risk exposure event, and ii) those with full medication adherence versus partial adherence. Inadequate PPE for aerosol-generating procedures was defined as not having both an N95 mask and eye protection, or not using a power air-purifying respirator (PAPR).

We defined symptomatic confirmed Covid-19 infection as having COVID-19-compatible illness with PCR testing within 4 days before onset of symptoms or within 11 days after onset of symptoms. If a participant had a positive PCR test, symptoms within 14 days of testing was considered symptomatic infection.

Full adherence was defined as 100% adherence at a minimum of 80% of surveys completed.

### *Subgroups*

Subgroups of interest included age, sex, occupation (first responder vs. healthcare worker), occupational setting (congregate care setting vs. other), participants performing aerosol-generating procedures, high-risk (defined as performing aerosol-generating procedures with inadequate PPE), and geographic region.

### *Study Oversight*

The trial was designed by the first author, in collaboration with all of the investigators. This trial was approved by the University of Minnesota Institutional Review Board, conducted under FDA Investigational New Drug (149252), and overseen by an independent DSMB. In Canada, the trial was authorized without objection by Health Canada (control number 238396), with ethics approval obtained from the University of Manitoba.

Figure S1. Map of Enrollment by State

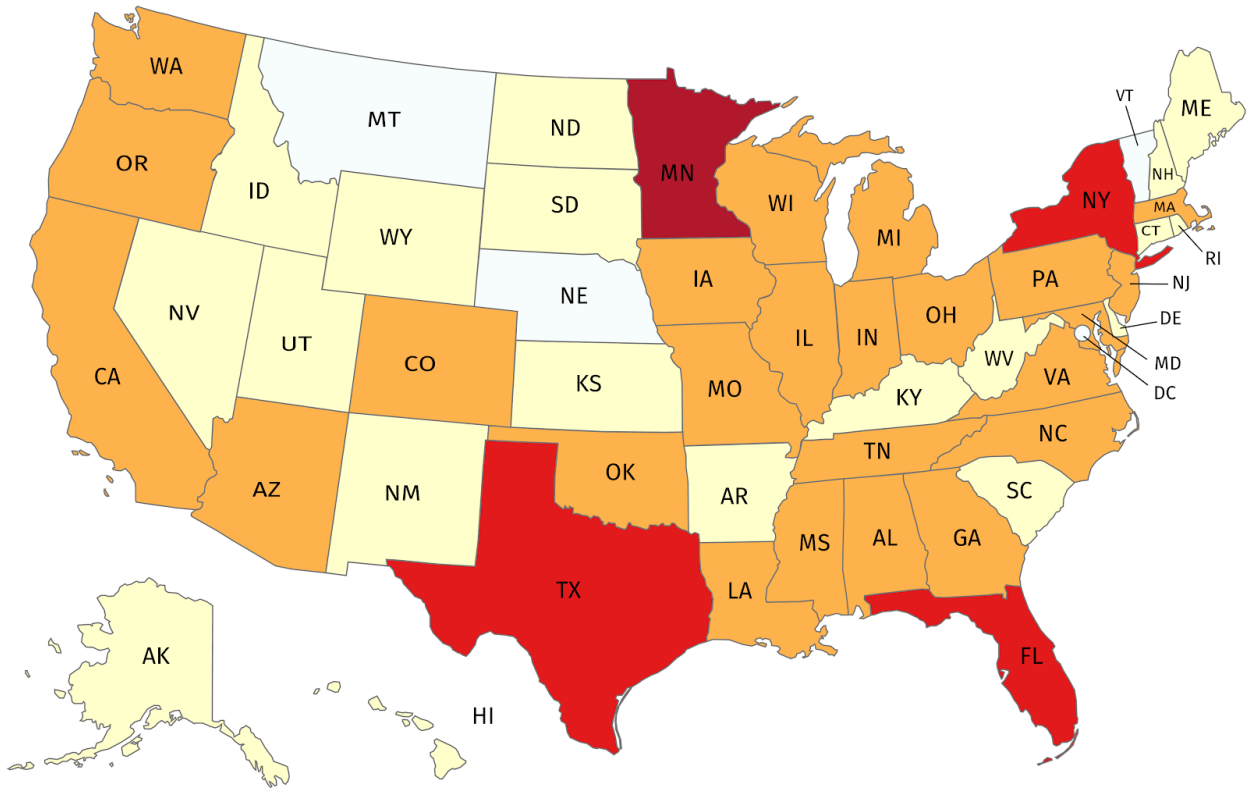

Maroon >10%, Red = 5.1% to 10%, Orange 1 to 5%, Light yellow <1%, White 0% enrolled. An additional 3 participants (0.2%) were enrolled from Manitoba, Canada, and 3 participants (0.2%) from Puerto Rico.

**Figure S2. Enrollment by Study Week**

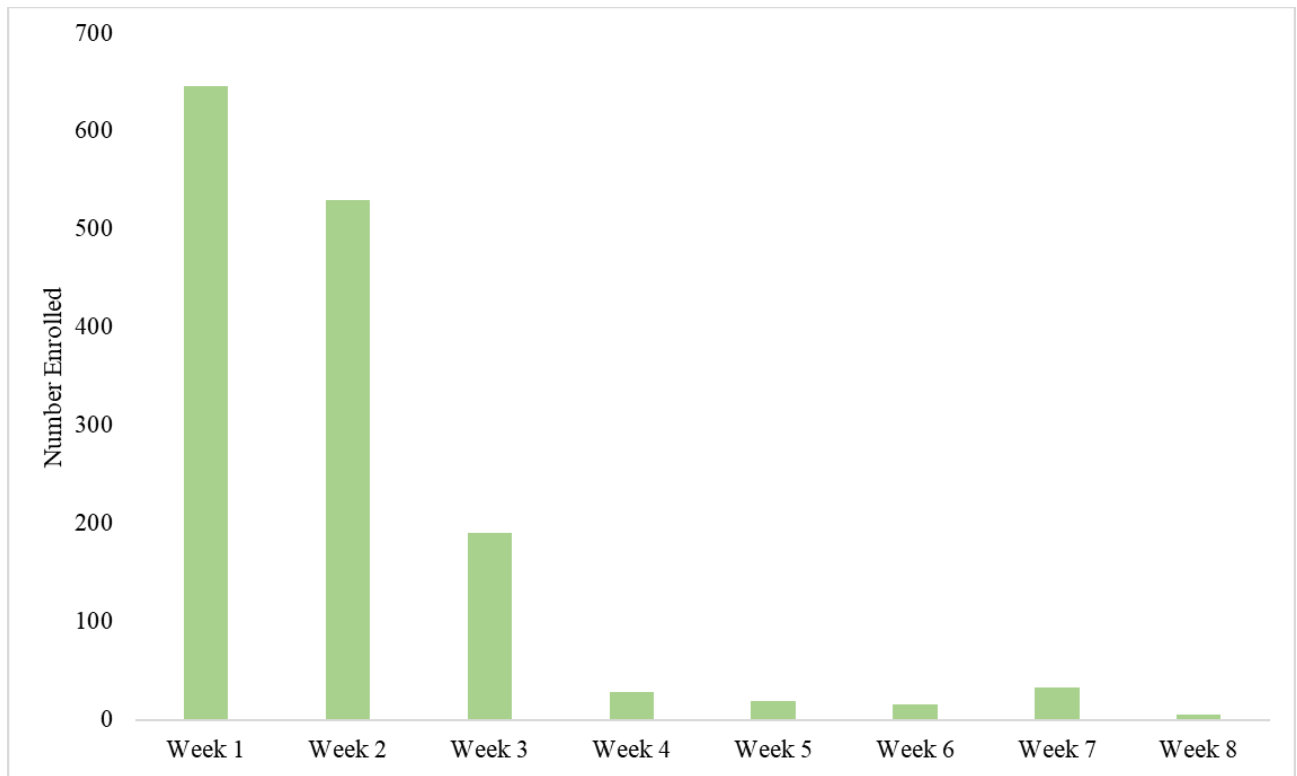

**Supplemental Table 1.** Baseline Demographics

|                                                            | Placebo        | Hydroxychloroquine<br>once weekly | Hydroxychloroquine<br>twice weekly |
|------------------------------------------------------------|----------------|-----------------------------------|------------------------------------|
| Number Randomized                                          | 494            | 494                               | 495                                |
| Age in years, median (interquartile range)                 | 40 (34, 48)    | 42 (35, 49)                       | 41 (35, 49)                        |
| Weight in kilograms, median (interquartile range)          | 80<br>(68, 94) | 79<br>(67, 93)                    | 82<br>(68, 95)                     |
| <b>Biologic Sex –no. (%)</b>                               |                |                                   |                                    |
| Male                                                       | 252 (51.0%)    | 228 (46.2%)                       | 235 (47.5%)                        |
| Female*                                                    | 241 (48.8%)    | 261 (52.8%)                       | 258 (52.1%)                        |
| Not Stated                                                 | 1 (0.2%)       | 5 (1.0%)                          | 2 (0.4%)                           |
| <b>Ethnicity (all that apply) –no. (%)</b>                 |                |                                   |                                    |
| White or Caucasian                                         | 419 (84.8%)    | 431 (87.2%)                       | 421 (85.1%)                        |
| Black or African                                           | 10 (2.0%)      | 5 (1.0%)                          | 5 (1.0%)                           |
| Asian                                                      | 29 (5.9%)      | 23 (4.7%)                         | 23 (4.6%)                          |
| Native Hawaiian or Pacific Islander                        | 1 (0.2%)       | 0 (0.0%)                          | 1 (0.2%)                           |
| Hispanic or Latino                                         | 18 (3.6%)      | 18 (3.6%)                         | 22 (4.4%)                          |
| Native American or Alaska Native                           | 8 (1.6%)       | 4 (0.8%)                          | 7 (1.4%)                           |
| Middle Eastern                                             | 4 (0.8%)       | 6 (1.2%)                          | 5 (1.0%)                           |
| South Asian                                                | 12 (2.4%)      | 17 (3.4%)                         | 18 (3.6%)                          |
| Other                                                      | 4 (0.8%)       | 3 (0.6%)                          | 1 (0.2%)                           |
| <b>Current Smoker –no. (%)</b>                             |                |                                   |                                    |
| Yes                                                        | 13 (2.6%)      | 17 (3.4%)                         | 21 (4.2%)                          |
| No                                                         | 480 (97.2%)    | 472 (95.5%)                       | 472 (95.4%)                        |
| Not stated                                                 | 1 (0.2%)       | 5 (1.0%)                          | 2 (0.4%)                           |
| <b>Regularly taking the following medications –no. (%)</b> |                |                                   |                                    |
| Losartan or other Angiotensin Receptor Blocker             | 21 (4.3%)      | 25 (5.1%)                         | 26 (5.3%)                          |

|                                                            |             |             |             |
|------------------------------------------------------------|-------------|-------------|-------------|
| Aspirin                                                    | 24 (4.9%)   | 29 (5.9%)   | 25 (5.1%)   |
| Ibuprofen/naproxen                                         | 31 (6.3%)   | 39 (7.9%)   | 20 (4.0%)   |
| Tylenol                                                    | 18 (3.6%)   | 34 (6.9%)   | 21 (4.2%)   |
| None                                                       | 417 (84.4%) | 390 (78.9%) | 418 (84.4%) |
| <b>Chronic Health Conditions (all that apply) –no. (%)</b> |             |             |             |
| High blood pressure                                        | 60 (12.1%)  | 79 (16.0%)  | 66 (13.3%)  |
| Diabetes                                                   | 14 (2.8%)   | 18 (3.6%)   | 18 (3.6%)   |
| Cardiovascular disease                                     | 3 (0.6%)    | 5 (1.0%)    | 3 (0.6%)    |
| Cancer or malignancy                                       | 1 (0.2%)    | 2 (0.4%)    | 1 (0.2%)    |
| Chronic kidney disease                                     | 0 (0.0%)    | 0 (0.0%)    | 1 (0.2%)    |
| Asthma                                                     | 59 (11.9%)  | 46 (9.3%)   | 45 (9.1%)   |
| Another chronic lung disease                               | 1 (0.2%)    | 2 (0.4%)    | 3 (0.6%)    |
| Chronic liver disease                                      | 0 (0.0%)    | 0 (0.0%)    | 0 (0.0%)    |
| HIV                                                        | 1 (0.2%)    | 1 (0.2%)    | 0 (0.0%)    |
| Transplant Recipient                                       | 0 (0.0%)    | 0 (0.0%)    | 0 (0.0%)    |
| Steroids, chemotherapy, immunosuppressants                 | 4 (0.8%)    | 5 (1.0%)    | 1 (0.2%)    |
| Hepatitis B or C                                           | 2 (0.4%)    | 1 (0.2%)    | 0 (0.0%)    |
| Other                                                      | 39 (7.9%)   | 55 (11.1%)  | 45 (9.1%)   |
| None                                                       | 336 (68.0%) | 311 (63.0%) | 335 (67.7%) |
| <b>Participant Region –no. (%)</b>                         |             |             |             |
| Northeast                                                  | 87 (19.7%)  | 82 (18.3%)  | 81 (18.0%)  |
| Midwest + Canada                                           | 207 (46.9%) | 216 (48.3%) | 215 (47.7%) |
| South + Puerto Rico                                        | 91 (20.6%)  | 95 (21.3%)  | 88 (19.5%)  |
| West                                                       | 56 (12.7%)  | 54 (12.1%)  | 67 (14.9%)  |

\* No participants reported pregnancy; thirty were breastfeeding at baseline.

**Supplemental Table 2.** Baseline Risk of Covid-19

|                                                                                                                                | Placebo      | Hydroxychloroquine<br>once weekly | Hydroxychloroquine<br>twice weekly |
|--------------------------------------------------------------------------------------------------------------------------------|--------------|-----------------------------------|------------------------------------|
| Number Randomized                                                                                                              | 494          | 494                               | 495                                |
| Do you suspect you had COVID-19 disease at any point since the outbreak started? –no. (%)                                      |              |                                   |                                    |
| No                                                                                                                             | 315 (63.8%)  | 299 (60.5%)                       | 296 (59.8%)                        |
| Maybe, exposed to probable COVID19 case, NO symptoms                                                                           | 66 (13.4%)   | 80 (16.2%)                        | 64 (12.9%)                         |
| Maybe, exposed to confirmed COVID19 case, NO symptoms                                                                          | 112 (22.7%)  | 115 (23.3%)                       | 134 (27.1%)                        |
| Yes, exposed to probable COVID19 case, symptoms                                                                                | 0 (0.0%)     | 0 (0.0%)                          | 1 (0.2%)                           |
| Yes, exposed to confirmed COVID19 case, symptoms                                                                               | 1 (0.2%)     | 0 (0.0%)                          | 0 (0.0%)                           |
| Have you or will you have direct contact with COVID19 patients? –no. (%)                                                       |              |                                   |                                    |
| Yes                                                                                                                            | 494 (100.0%) | 491 (99.4%)                       | 494 (99.8%)                        |
| No                                                                                                                             | 0 (0.0%)     | 3 (0.6%)                          | 1 (0.2%)                           |
| Have you interacted with Covid19 patients when NOT wearing a mask (surgical, n95, PAPR) or NOT wearing a face shield? –no. (%) |              |                                   |                                    |
| Yes                                                                                                                            | 62 (12.6%)   | 69 (14.1%)                        | 85 (17.2%)                         |
| No                                                                                                                             | 432 (87.4%)  | 422 (85.9%)                       | 409 (82.8%)                        |
| In a typical week, how many hours total are you in contact with patients? –no. (%)                                             |              |                                   |                                    |
| >14 hours                                                                                                                      | 438 (88.7%)  | 452 (92.1%)                       | 456 (92.3%)                        |
| 1-14 hours                                                                                                                     | 53 (10.7%)   | 37 (7.5%)                         | 37 (7.5%)                          |
| 0 hours                                                                                                                        | 3 (0.6%)     | 2 (0.4%)                          | 1 (0.2%)                           |
| Will you be involved in aerosol-generating procedures? –no. (%)                                                                |              |                                   |                                    |
| Yes                                                                                                                            | 410 (83.0%)  | 378 (77.0%)                       | 377 (76.3%)                        |
| No                                                                                                                             | 84 (17.0%)   | 113 (23.0%)                       | 117 (23.7%)                        |
| How many aerosol-generating procedures do you perform per week, on average? –no.                                               |              |                                   |                                    |
|                                                                                                                                | 10           | 9                                 | 9                                  |
| PPE typically worn when performing aerosolizing generating procedures - no. (%)                                                |              |                                   |                                    |
| Surgical mask                                                                                                                  | 162 (32.8%)  | 145 (29.4%)                       | 142 (28.7%)                        |

|                         |             |             |             |
|-------------------------|-------------|-------------|-------------|
| n95 or PAPR             | 385 (77.9%) | 356 (72.1%) | 357 (72.1%) |
| Face shield or eye mask | 334 (67.6%) | 312 (63.2%) | 306 (61.8%) |
| Gloves                  | 359 (72.7%) | 340 (68.8%) | 329 (66.5%) |
| Gown                    | 316 (64.0%) | 301 (60.9%) | 294 (59.4%) |
| None reported           | 3 (0.6%)    | 5 (1.0%)    | 5 (1.0%)    |

Occupation –no. (%)

|                                                                             |             |             |             |
|-----------------------------------------------------------------------------|-------------|-------------|-------------|
| Emergency Medicine Provider (Physician, nurse, advanced practice provider)  | 190 (38.5%) | 205 (41.5%) | 202 (40.8%) |
| Intensive Care Unit Provider (Physician, nurse, advanced practice provider) | 83 (16.8%)  | 81 (16.4%)  | 79 (16.0%)  |
| Anesthesia / ENT                                                            | 105 (21.3%) | 90 (18.2%)  | 88 (17.8%)  |
| First Responder (EMT, paramedic, and others)                                | 65 (13.2%)  | 58 (11.7%)  | 57 (11.5%)  |
| Healthcare Worker in Covid-19 Unit                                          | 29 (5.9%)   | 41 (8.3%)   | 35 (7.1%)   |
| Healthcare Worker in Congregate Care Setting                                | 4 (0.8%)    | 3 (0.6%)    | 8 (1.6%)    |
| Other                                                                       | 18 (3.6%)   | 16 (3.2%)   | 26 (5.3%)   |

In what setting do you expect your highest risk exposure could occur? –no. (%)

|                                   |             |             |             |
|-----------------------------------|-------------|-------------|-------------|
| Emergency Department              | 190 (38.5%) | 210 (42.5%) | 207 (41.8%) |
| Intensive Care Unit               | 85 (17.2%)  | 82 (16.6%)  | 102 (20.6%) |
| Clinic                            | 8 (1.6%)    | 12 (2.4%)   | 18 (3.6%)   |
| Hospital ward                     | 10 (2.0%)   | 15 (3.0%)   | 13 (2.6%)   |
| COVID19 ward                      | 56 (11.3%)  | 51 (10.3%)  | 47 (9.5%)   |
| Ambulance, Air Ambulance, Medivac | 45 (9.1%)   | 40 (8.1%)   | 33 (6.7%)   |
| Operating Room                    | 75 (15.2%)  | 61 (12.3%)  | 42 (8.5%)   |
| Congregate Care Setting           | 20 (4.0%)   | 19 (3.8%)   | 27 (5.5%)   |
| Other                             | 5 (1.0%)    | 1 (0.2%)    | 5 (1.0%)    |
| Not indicated                     | 0 (0.0%)    | 3 (0.6%)    | 1 (0.2%)    |



**Supplemental Table 3.** Primary Event by Symptoms and PCR Testing

|                                                                                          | <b>Total<br/>(n=1483)</b> | <b>Placebo<br/>(n=494)</b> | <b>Hydroxychloroquine<br/>once weekly (n=494)</b> | <b>Hydroxychloroquine<br/>twice weekly (n=495)</b> |
|------------------------------------------------------------------------------------------|---------------------------|----------------------------|---------------------------------------------------|----------------------------------------------------|
| Primary event (confirmed or probable COVID-19)                                           | 97 (6.5%)                 | 39 (7.9%)                  | 29 (5.9%)                                         | 29 (5.9%)                                          |
| Positive PCR, symptoms* within 14 days before test                                       | 7 (0.5%)                  | 3 (0.6%)                   | 2 (0.4%)                                          | 2 (0.4%)                                           |
| Positive PCR, symptoms* within 14 days after test                                        | 9 (0.6%)                  | 2 (0.4%)                   | 2 (0.4%)                                          | 5 (1.0%)                                           |
| Positive PCR, symptoms* earlier than 14 days before test                                 | 0 (0.0%)                  | 0 (0.0%)                   | 0 (0.0%)                                          | 0 (0.0%)                                           |
| Positive PCR, never symptoms                                                             | 1 (0.1%)                  | 1 (0.2%)                   | 0 (0.0%)                                          | 0 (0.0%)                                           |
| Probable (Covid-compatible symptoms)**, negative PCR within 4 days before symptoms       | 30 (2.0%)                 | 16 (3.2%)                  | 10 (2.0%)                                         | 4 (0.8%)                                           |
| Probable (Covid-compatible symptoms)**, negative PCR within 11 days after symptoms       | 8 (0.5%)                  | 5 (1.0%)                   | 1 (0.2%)                                          | 2 (0.4%)                                           |
| Probable (Covid-compatible symptoms)**, negative PCR beyond 11 days after symptoms       | 5 (0.3%)                  | 3 (0.6%)                   | 0 (0.0%)                                          | 2 (0.4%)                                           |
| Probable (Covid-compatible symptoms)**, negative PCR earlier than 4 days before symptoms | 8 (0.5%)                  | 2 (0.4%)                   | 4 (0.8%)                                          | 2 (0.4%)                                           |
| Probable (Covid-compatible symptoms)**, no test result                                   | 29 (2.0%)                 | 7 (1.4%)                   | 10 (2.0%)                                         | 12 (2.4%)                                          |

\* Symptoms are those adjudicated as probably or possibly Covid-19 related. All adjudications were blinded to treatment assignment.

\*\* Probable (Covid-19 compatible symptoms) are those adjudicated as probably Covid-19 related

**Figure S3.** Kaplan Meier Estimate of Time to Confirmed PCR Positive Covid-19 Infection. The probability of PCR-confirmed Covid-19 infection is shown for the three study groups. The hazard ratio for twice weekly hydroxychloroquine prophylaxis was 1.18 (95%CI 0.40 to 3.51; P=0.77) and for once weekly was 0.65 (95%CI 0.18 to 2.32; P=0.51) as compared with placebo.

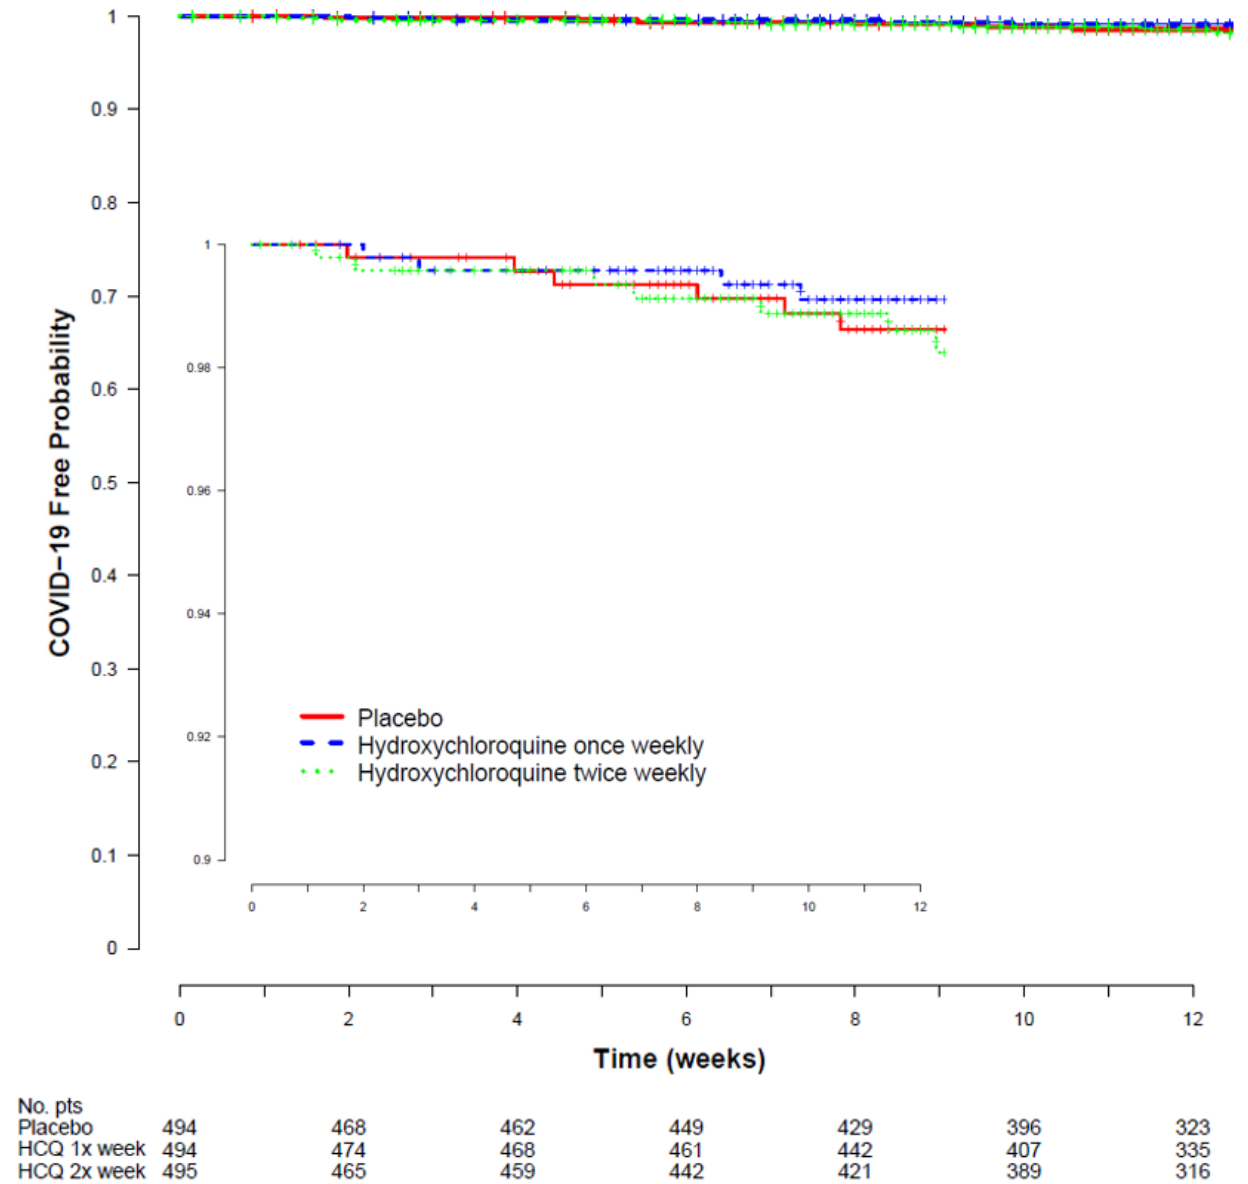

**Figure S4.** Kaplan Meier Estimate of Time to Covid-19 Compatible Symptoms. The probability of Covid-19 Compatible symptoms is shown for the three study groups. The hazard ratio for twice weekly hydroxychloroquine prophylaxis was 0.74 (95%CI 0.45 to 1.20; P=0.22) and for once weekly was 0.73 (95%CI 0.45 to 1.19; P=0.21) as compared with placebo.

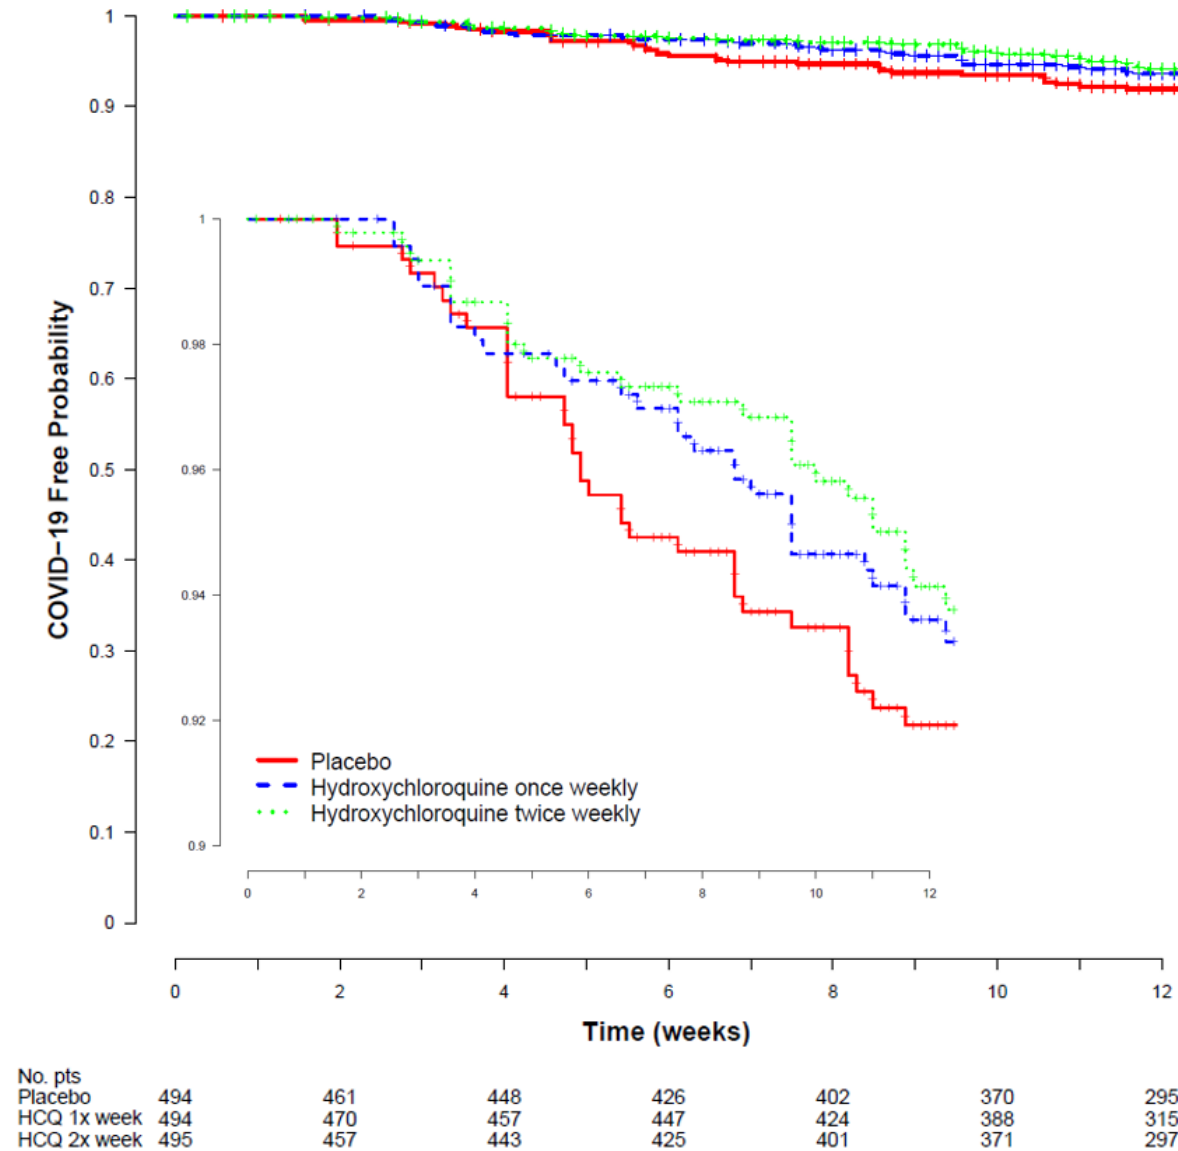

**Figure S5.** Distribution of Symptoms for Covid-19 Compatible Cases Designated as PCR-Confirmed Covid-19

| Final Case Classification | Cough | Fever | Dyspnea | Headache | Sore Throat | Fatigue | Myalgias | Anosmia | Diarrhea | Rhinorrhea | Nasal Congestion | Number of COVID-19 Symptoms |
|---------------------------|-------|-------|---------|----------|-------------|---------|----------|---------|----------|------------|------------------|-----------------------------|
| Confirmed                 |       |       |         |          |             |         |          |         |          |            |                  | 0                           |
| Confirmed                 |       |       |         |          |             |         |          |         |          |            |                  | 2                           |
| Confirmed                 |       |       |         |          |             |         |          |         |          |            |                  | 4                           |
| Confirmed                 |       |       |         |          |             |         |          |         |          |            |                  | 4                           |
| Confirmed                 |       |       |         |          |             |         |          |         |          |            |                  | 4                           |
| Confirmed                 |       |       |         |          |             |         |          |         |          |            |                  | 3                           |
| Confirmed                 |       |       |         |          |             |         |          |         |          |            |                  | 0                           |
| Confirmed                 |       |       |         |          |             |         |          |         |          |            |                  | 7                           |
| Confirmed                 |       |       |         |          |             |         |          |         |          |            |                  | 5                           |
| Confirmed                 |       |       |         |          |             |         |          |         |          |            |                  | 4                           |
| Confirmed                 |       |       |         |          |             |         |          |         |          |            |                  | 2                           |
| Confirmed                 |       |       |         |          |             |         |          |         |          |            |                  | 0                           |
| Confirmed                 |       |       |         |          |             |         |          |         |          |            |                  | 2                           |
| Confirmed                 |       |       |         |          |             |         |          |         |          |            |                  | 2                           |
| Confirmed                 |       |       |         |          |             |         |          |         |          |            |                  | 2                           |
| Confirmed                 |       |       |         |          |             |         |          |         |          |            |                  | 2                           |
| Confirmed                 |       |       |         |          |             |         |          |         |          |            |                  | 6                           |
| Confirmed                 |       |       |         |          |             |         |          |         |          |            |                  | 4                           |
| Confirmed                 |       |       |         |          |             |         |          |         |          |            |                  | 5                           |

**Figure S6.** Distribution of Symptoms for Covid-19 Compatible Cases Designated as Probable Covid-19

| <b>Final Case Classification</b> | Cough | Fever | Dyspnea | Headache | Sore Throat | Fatigue | Myalgias | Anosmia | Diarrhea | Rhinorrhea | Nasal Congestion | <b>Number of COVID-19 Symptoms</b> |
|----------------------------------|-------|-------|---------|----------|-------------|---------|----------|---------|----------|------------|------------------|------------------------------------|
| Probable                         | ■     |       |         | ■        |             |         | ■        |         |          |            |                  | <b>3</b>                           |
| Probable                         |       |       |         |          | ■           |         |          | ■       |          |            | ■                | <b>2</b>                           |
| Probable                         |       | ■     |         |          |             | ■       | ■        |         | ■        |            |                  | <b>3</b>                           |
| Probable                         | ■     |       |         |          |             |         |          |         |          |            |                  | <b>1</b>                           |
| Probable                         | ■     |       |         | ■        |             |         |          |         |          |            |                  | <b>1</b>                           |
| Probable                         | ■     |       |         |          | ■           |         |          |         |          | ■          |                  | <b>2</b>                           |
| Probable                         | ■     | ■     | ■       | ■        |             | ■       | ■        |         | ■        |            |                  | <b>5</b>                           |
| Probable                         |       | ■     | ■       | ■        |             |         |          |         |          | ■          | ■                | <b>1</b>                           |
| Probable                         |       |       |         | ■        |             | ■       | ■        |         | ■        |            |                  | <b>3</b>                           |
| Probable                         |       |       |         | ■        | ■           | ■       | ■        |         |          |            |                  | <b>3</b>                           |
| Probable                         | ■     |       |         |          |             | ■       |          |         |          |            | ■                | <b>1</b>                           |
| Probable                         | ■     | ■     | ■       | ■        |             | ■       | ■        | ■       |          |            | ■                | <b>2</b>                           |
| Probable                         | ■     | ■     | ■       | ■        | ■           | ■       | ■        | ■       |          |            |                  | <b>6</b>                           |
| Probable                         | ■     |       |         |          | ■           |         |          |         |          | ■          |                  | <b>2</b>                           |
| Probable                         | ■     |       |         | ■        | ■           | ■       | ■        |         |          | ■          | ■                | <b>1</b>                           |
| Probable                         | ■     |       |         | ■        | ■           | ■       | ■        | ■       | ■        | ■          | ■                | <b>5</b>                           |
| Probable                         |       | ■     | ■       | ■        | ■           | ■       | ■        |         |          |            |                  | <b>5</b>                           |
| Probable                         | ■     |       |         | ■        |             | ■       | ■        |         |          |            |                  | <b>3</b>                           |
| Probable                         | ■     |       |         |          | ■           |         |          |         |          |            |                  | <b>2</b>                           |
| Probable                         | ■     |       |         |          | ■           | ■       | ■        | ■       |          |            |                  | <b>1</b>                           |
| Probable                         | ■     |       |         | ■        | ■           | ■       | ■        | ■       |          |            | ■                | <b>4</b>                           |
| Probable                         |       | ■     |         | ■        | ■           | ■       | ■        |         | ■        |            | ■                | <b>5</b>                           |
| Probable                         |       | ■     | ■       | ■        | ■           | ■       | ■        |         |          |            |                  | <b>4</b>                           |





**Figure S7.** Distribution of Symptoms for Covid-19 Compatible Cases Designated as Possible Covid-19

| Final Case Classification | Cough | Fever | Dyspnea | Headache | Sore Throat | Fatigue | Myalgias | Anosmia | Diarrhea | Rhinorrhea | Nasal Congestion | Number of COVID-19 Symptoms |
|---------------------------|-------|-------|---------|----------|-------------|---------|----------|---------|----------|------------|------------------|-----------------------------|
| Possible                  |       |       |         |          | ■           |         | ■        |         | ■        |            | ■                | 1                           |
| Possible                  |       |       |         |          |             |         | ■        |         | ■        |            |                  | 1                           |
| Possible                  |       |       |         | ■        |             |         |          |         | ■        |            |                  | 1                           |
| Possible                  |       |       |         |          | ■           |         |          |         |          |            |                  | 1                           |
| Possible                  |       |       |         |          | ■           | ■       |          |         |          |            |                  | 2                           |
| Possible                  |       |       |         | ■        |             | ■       |          |         |          |            |                  | 2                           |
| Possible                  |       |       |         |          |             |         | ■        |         | ■        |            |                  | 1                           |
| Possible                  |       |       |         |          | ■           |         |          |         |          | ■          |                  | 1                           |
| Possible                  |       |       |         |          | ■           |         |          |         |          | ■          | ■                | 1                           |
| Possible                  |       |       |         |          | ■           |         |          |         |          |            | ■                | 1                           |
| Possible                  |       |       |         |          | ■           |         |          |         |          |            | ■                | 1                           |
| Possible                  |       |       |         |          | ■           |         |          |         |          |            | ■                | 1                           |
| Possible                  |       |       |         |          | ■           |         |          |         |          |            | ■                | 1                           |
| Possible                  |       |       |         |          | ■           |         |          | ■       |          |            |                  | 1                           |
| Possible                  |       |       |         |          | ■           | ■       |          |         |          |            |                  | 2                           |
| Possible                  |       |       |         | ■        |             |         |          |         |          |            |                  | 1                           |
| Possible                  |       |       |         |          | ■           |         |          |         |          |            | ■                | 1                           |
| Possible                  |       |       |         |          | ■           |         |          |         |          |            | ■                | 1                           |
| Possible                  |       |       |         |          | ■           |         |          |         |          |            | ■                | 1                           |
| Possible                  |       |       |         |          | ■           |         |          |         | ■        |            |                  | 1                           |
| Possible                  |       |       |         | ■        |             |         |          |         |          |            | ■                | 1                           |
| Possible                  |       |       |         |          | ■           |         |          |         |          |            | ■                | 1                           |
| Possible                  |       |       |         |          | ■           | ■       | ■        |         |          |            |                  | 2                           |
| Possible                  |       |       |         | ■        |             |         |          |         |          |            |                  | 1                           |



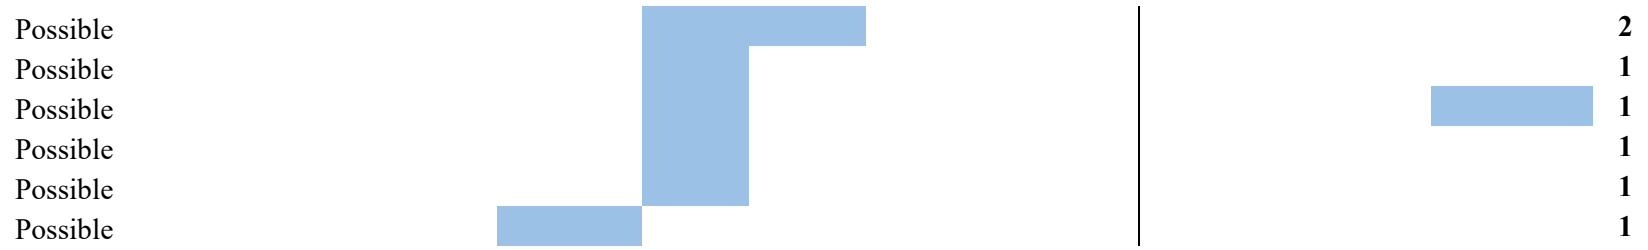

Inter-observer reliability was 88%. Out of 291 adjudications, 255 were in complete agreement between all three infectious diseases physicians. Rhinorrhea, nasal congestion, and diarrhea are not part of the US case definition (and not included in the count of COVID-related symptoms).

**Figure S8.** Percentage of Participants Reporting Side Effects From Study Medication, by Week.

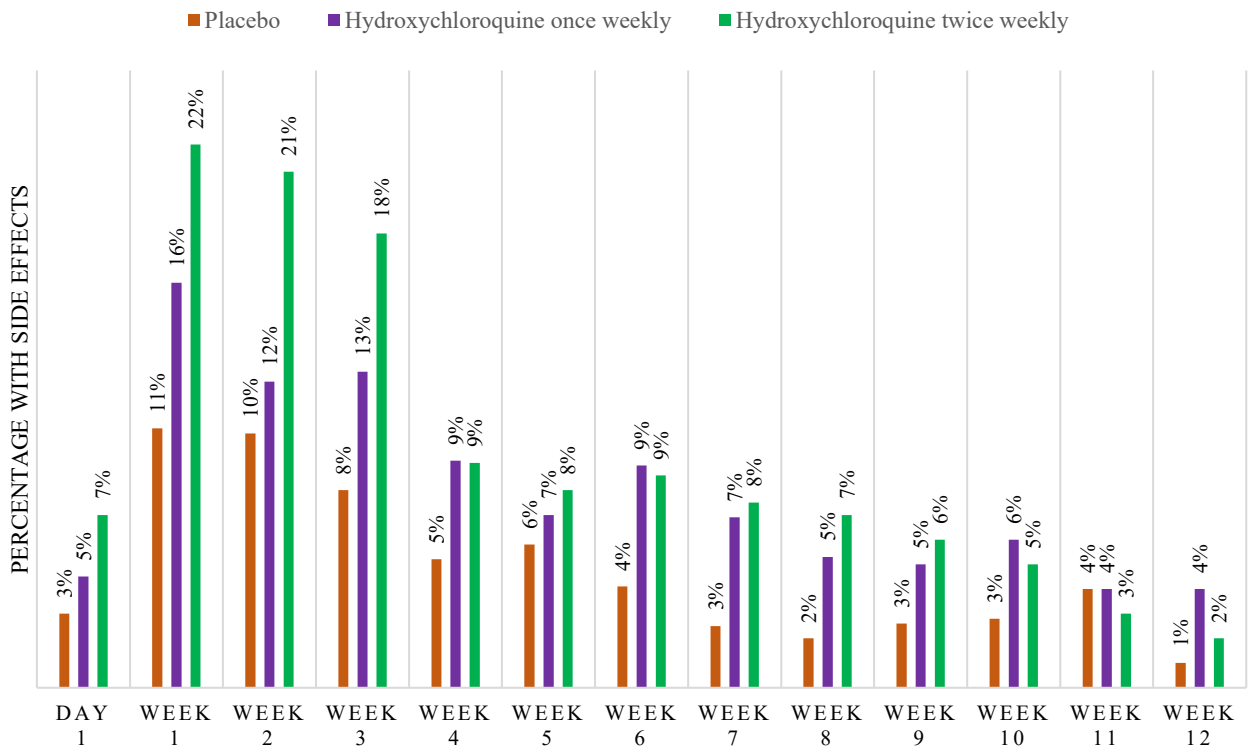

**Supplemental Table 4.** Reported Side Effects Since Starting Study Medicine

|                                                  | <b>Placebo</b> | <b>Hydroxychloroquine<br/>once weekly</b> | <b>Hydroxychloroquine<br/>twice weekly</b> |
|--------------------------------------------------|----------------|-------------------------------------------|--------------------------------------------|
| Any side effect, N (%)                           | 100 (21.4%)    | 148 (31.3%)                               | 168 (36.4%)                                |
| Side Effects Present<br>(Not Mutually Exclusive) |                |                                           |                                            |
| Stomach                                          | 57 (12.2%)     | 83 (17.5%)                                | 90 (19.4%)                                 |
| Diarrhea/GI                                      | 35 (7.5%)      | 61 (12.9%)                                | 79 (17.1%)                                 |
| Neurologic                                       | 22 (4.7%)      | 27 (5.7%)                                 | 24 (5.2%)                                  |
| Headache                                         | 12 (2.6%)      | 14 (3.0%)                                 | 8 (1.7%)                                   |
| Skin                                             | 11 (2.3%)      | 13 (2.7%)                                 | 23 (5.0%)                                  |
| Palpitations                                     | 8 (1.7%)       | 4 (0.8%)                                  | 6 (1.3%)                                   |
| Sleep disturbance                                | 7 (1.5%)       | 10 (2.1%)                                 | 7 (1.5%)                                   |
| Tinnitus                                         | 5 (1.1%)       | 10 (2.1%)                                 | 7 (1.5%)                                   |
| Vision                                           | 3 (0.6%)       | 7 (1.5%)                                  | 4 (0.9%)                                   |
| Allergic Reaction                                | 3 (0.6%)       | 2 (0.4%)                                  | 4 (0.9%)                                   |
| Myalgia                                          | 2 (0.4%)       | 7 (1.5%)                                  | 1 (0.2%)                                   |
| Bloody nose                                      | 1 (0.2%)       | 1 (0.2%)                                  | 1 (0.2%)                                   |
| Appetite change                                  | 1 (0.2%)       | 2 (0.4%)                                  | 1 (0.2%)                                   |
| Joint pain                                       | 1 (0.2%)       | 3 (0.6%)                                  | 0 (0.0%)                                   |
| Low Energy                                       | 1 (0.2%)       | 1 (0.2%)                                  | 5 (1.1%)                                   |
| Mouth ulcers                                     | 0 (0.0%)       | 1 (0.2%)                                  | 4 (0.9%)                                   |
| Yeast infection                                  | 0 (0.0%)       | 2 (0.4%)                                  | 0 (0.0%)                                   |
| Dry mouth                                        | 0 (0.0%)       | 1 (0.2%)                                  | 2 (0.4%)                                   |
| Other                                            | 3 (0.6%)       | 6 (1.3%)                                  | 6 (1.3%)                                   |

Each side effect type is counted only once per person

**Supplemental Table 5.** GI Side Effects (Diarrhea) by Week

|         | Placebo   | Hydroxychloroquine<br>once weekly | Hydroxychloroquine<br>twice weekly |
|---------|-----------|-----------------------------------|------------------------------------|
| Week 1  | 13 (3.1%) | 23 (5.3%)                         | 39 (9.4%)                          |
| Week 2  | 14 (3.3%) | 22 (5.0%)                         | 41 (9.9%)                          |
| Week 3  | 10 (2.4%) | 14 (3.2%)                         | 31 (7.5%)                          |
| Week 4  | 9 (2.1%)  | 12 (2.8%)                         | 16 (3.9%)                          |
| Week 5  | 8 (2.0%)  | 10 (2.4%)                         | 15 (3.8%)                          |
| Week 6  | 4 (1.0%)  | 13 (3.1%)                         | 15 (3.9%)                          |
| Week 7  | 2 (0.5%)  | 10 (2.5%)                         | 14 (3.9%)                          |
| Week 8  | 4 (1.1%)  | 12 (3.2%)                         | 16 (4.5%)                          |
| Week 9  | 0 (0.0%)  | 8 (2.3%)                          | 10 (3.1%)                          |
| Week 10 | 1 (0.3%)  | 7 (2.1%)                          | 6 (2.0%)                           |
| Week 11 | 1 (0.4%)  | 4 (1.5%)                          | 5 (2.0%)                           |
| Week 12 | 0 (0.0%)  | 3 (2.0%)                          | 3 (2.3%)                           |

**Supplemental Table 6.** Stomach Side Effects (Upset Stomach, Nausea) by Week

|         | Placebo   | Hydroxychloroquine<br>once weekly | Hydroxychloroquine<br>twice weekly |
|---------|-----------|-----------------------------------|------------------------------------|
| Week 1  | 23 (5.5%) | 38 (8.8%)                         | 50 (12.1%)                         |
| Week 2  | 27 (6.3%) | 25 (5.7%)                         | 42 (10.1%)                         |
| Week 3  | 18 (4.2%) | 27 (6.1%)                         | 38 (9.2%)                          |
| Week 4  | 12 (2.9%) | 19 (4.4%)                         | 18 (4.4%)                          |
| Week 5  | 12 (2.9%) | 16 (3.8%)                         | 12 (3.0%)                          |
| Week 6  | 11 (2.7%) | 18 (4.4%)                         | 12 (3.1%)                          |
| Week 7  | 7 (1.8%)  | 14 (3.5%)                         | 13 (3.6%)                          |
| Week 8  | 4 (1.1%)  | 8 (2.1%)                          | 12 (3.4%)                          |
| Week 9  | 7 (2.0%)  | 9 (2.6%)                          | 10 (3.1%)                          |
| Week 10 | 7 (2.2%)  | 12 (3.6%)                         | 7 (2.3%)                           |
| Week 11 | 4 (1.6%)  | 7 (2.6%)                          | 3 (1.2%)                           |
| Week 12 | 1 (0.7%)  | 5 (3.4%)                          | 1 (0.8%)                           |

**Figure S9.** Percentage of Participants with Full Medication Adherence by Survey Week

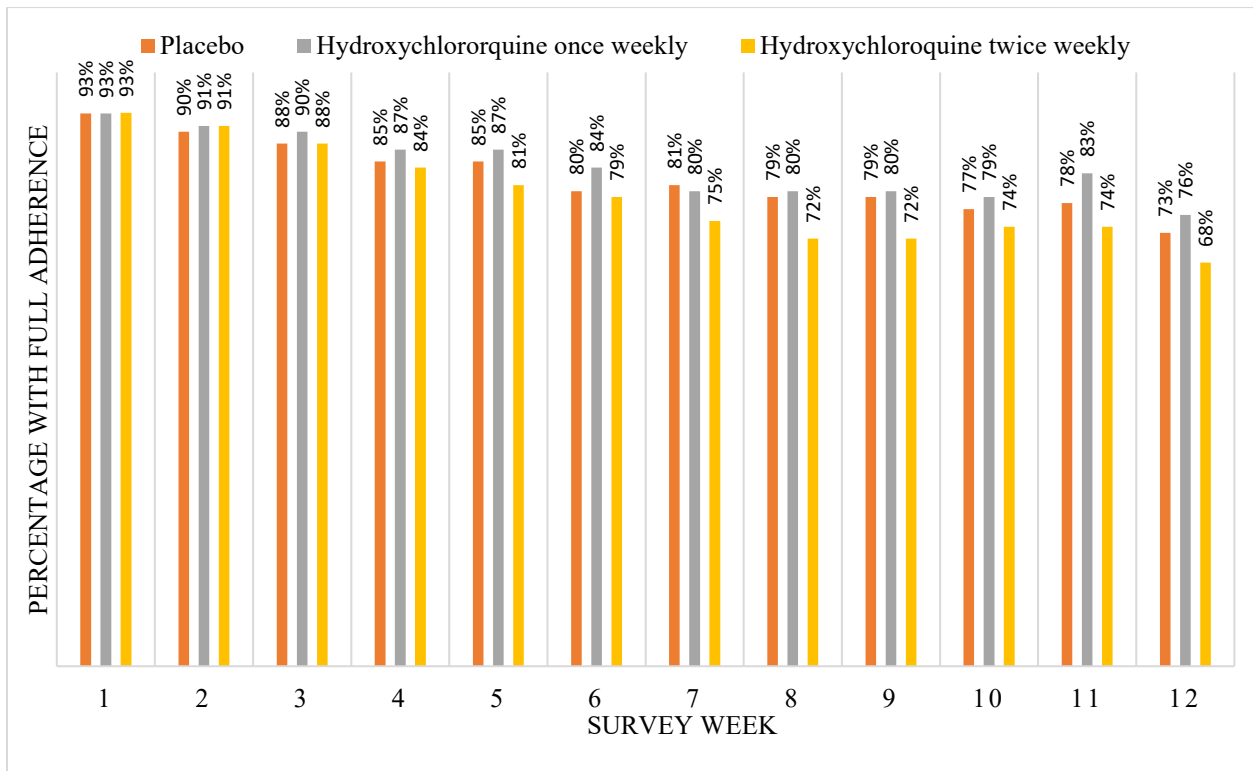

The percentage of participants with full medication adherence by survey week is independent of any other week's adherence (i.e. a non-adherent participant at Week 1 can be counted as adherent at Week 10.)

**Supplemental Table 7.** Demographics of Participants Enrolled in the Pharmacokinetic Sub-study

|                                                                                           | Hydroxychloroquine<br>once weekly<br>(n=97) | Hydroxychloroquine<br>twice weekly<br>(n=83) |
|-------------------------------------------------------------------------------------------|---------------------------------------------|----------------------------------------------|
| Age in years, median (range)                                                              | 41 (22-68)                                  | 43 (23-65)                                   |
| Female, no. (%)                                                                           | 53 (55)                                     | 38 (46)                                      |
| Weight in kg, median (range)                                                              | 81.3 (45.0-143.0)                           | 84.0 (52.7-140.7)                            |
| Days since drug start at time of sampling, median (range)                                 | 35 (27-62)                                  | 35 (25-71)                                   |
| Samples collected >144 hours (once weekly) or >72 hours (twice weekly) post dose, no. (%) | 84 (87)                                     | 61 (73)                                      |

**Figure S10.** Hydroxychloroquine drug concentrations in whole blood. Left, drug concentrations by dosing. Right, drug concentrations by outcome of confirmed Covid-19, probable Covid-19, possible Covid-19, and no Covid-19.

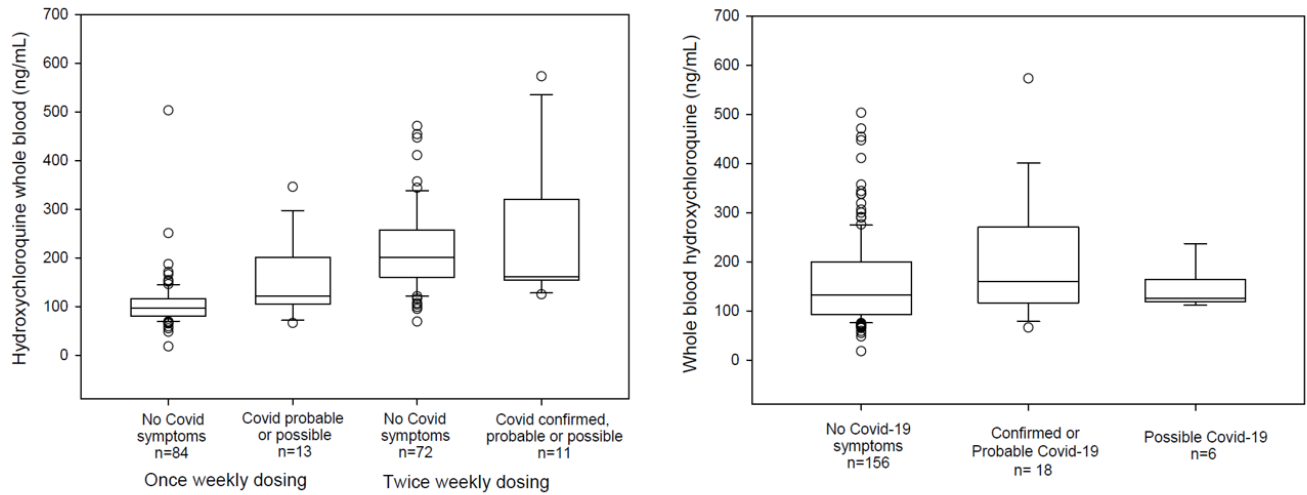

**Supplemental Table 8.** Secondary Outcomes

| Clinical Outcome                        | Placebo (n= 494)                          | Hydroxychloroquine once weekly (n=494) | Hydroxychloroquine twice weekly (n=495) | P value <sup>1</sup> | P value <sup>2</sup> |
|-----------------------------------------|-------------------------------------------|----------------------------------------|-----------------------------------------|----------------------|----------------------|
| Death                                   | 0 (0.0%)                                  | 0 (0.0%)                               | 0 (0.0%)                                |                      |                      |
| Intensive Care Unit admission           | 0 (0.0%)                                  | 0 (0.0%)                               | 0 (0.0%)                                |                      |                      |
| Participants hospitalized               | 7 (1.4%)                                  | 3 (0.6%)                               | 8 (1.6%)                                | 0.34                 | >0.99                |
| Total number of hospitalizations (SAEs) | 9                                         | 3                                      | 8                                       |                      |                      |
| Due to Covid-19                         | 1                                         | 0                                      | 1                                       |                      |                      |
| Due to adverse event                    | 0                                         | 0                                      | 1                                       |                      |                      |
| Due to other reason                     | 8                                         | 3                                      | 6                                       |                      |                      |
| If "other," specify:                    | Motor vehicle accident with injury        | Hysteroscopy                           | Elective coronary angiogram             |                      |                      |
|                                         | Chest pain, palpitations, tachycardia     | Diverticulitis                         | Gallbladder surgery                     |                      |                      |
|                                         | Hyperthyroid, chest pain, palpitations    | Spinal surgery                         | Urinary tract infection                 |                      |                      |
|                                         | Heat related exhaustion and abnormal labs |                                        | Outpatient surgery                      |                      |                      |
|                                         | Atrial fibrillation (x2)                  |                                        | Emergent surgery                        |                      |                      |
|                                         | Kidney stone, urinary tract infection     |                                        | Other, not specified (x2)               |                      |                      |
|                                         | Sarcoidosis related skin biopsy           |                                        |                                         |                      |                      |

All p-values are Fishers Exact or Wilcoxon Rank Sum. P value<sup>1</sup> for Hydroxychloroquine once weekly vs placebo, P value<sup>2</sup> for Hydroxychloroquine twice weekly vs placebo.

**Supplemental Table 9.** Combined Hydroxychloroquine Arms Compared to Placebo

|                                   | <b>Placebo<br/>(n=494)</b> | <b>Hydroxychloroquine<br/>(n=989)</b> | <b>HR<br/>(95% CI)</b> | <b>P Value</b> |
|-----------------------------------|----------------------------|---------------------------------------|------------------------|----------------|
| PCR positive or probable Covid-19 | 39 (7.9%)                  | 58 (5.9%)                             | 0.73<br>(0.48 to 1.09) | 0.12           |



**Supplemental Table 10.** Subgroup Analysis of Risk of Covid-19 Compatible Illness with Hydroxychloroquine Once Weekly

|                                           | Placebo    |              |                      | Hydroxychloroquine once weekly |              |                      |                      |                  |                     |
|-------------------------------------------|------------|--------------|----------------------|--------------------------------|--------------|----------------------|----------------------|------------------|---------------------|
|                                           | No. People | Events N (%) | Rate per Person Year | No. People                     | Events N (%) | Rate per Person Year | HR (95% CI)          | Subgroup P-value | Interaction P-value |
| Overall N                                 | 494        |              |                      | 494                            |              |                      |                      |                  |                     |
| Age, years                                |            |              |                      |                                |              |                      |                      |                  | 0.10                |
| 18-39                                     | 232        | 23 (9.9%)    | 0.50<br>(0.29, 0.70) | 200                            | 11 (5.5%)    | 0.27<br>(0.11, 0.42) | 0.53<br>(0.26, 1.09) | 0.09             |                     |
| 40-60                                     | 243        | 16 (6.6%)    | 0.31<br>(0.16, 0.46) | 258                            | 15 (5.8%)    | 0.27<br>(0.13, 0.40) | 0.86<br>(0.43, 1.74) | 0.68             |                     |
| >60                                       | 19         | 0 (0.0%)     | 0.00<br>(0.00, 0.00) | 36                             | 3 (8.3%)     | 0.38<br>(0.00, 0.81) |                      |                  |                     |
| Interaction p-value from continuous model |            |              |                      |                                |              |                      |                      |                  | 0.09                |
| Biologic Sex                              |            |              |                      |                                |              |                      |                      |                  | 0.37                |
| Male                                      | 252        | 15 (6.0%)    | 0.28<br>(0.14, 0.42) | 228                            | 13 (5.7%)    | 0.26<br>(0.12, 0.40) | 0.93<br>(0.44, 1.96) | 0.85             |                     |
| Female                                    | 241        | 24 (10.0%)   | 0.50<br>(0.30, 0.70) | 261                            | 16 (6.1%)    | 0.30<br>(0.15, 0.44) | 0.60<br>(0.32, 1.12) | 0.11             |                     |
| Occupation                                |            |              |                      |                                |              |                      |                      |                  | 0.19                |
| Healthcare Worker                         | 429        | 28 (6.5%)    | 0.31<br>(0.20, 0.43) | 436                            | 25 (5.7%)    | 0.27<br>(0.16, 0.37) | 0.86<br>(0.50, 1.47) | 0.57             |                     |
| First Responder                           | 65         | 11 (16.9%)   | 0.88<br>(0.36, 1.41) | 58                             | 4 (6.9%)     | 0.33<br>(0.01, 0.65) | 0.37<br>(0.12, 1.17) | 0.09             |                     |
| Setting                                   |            |              |                      |                                |              |                      |                      |                  | >0.99               |
| Congregate Care Facility                  | 4          | 0 (0.0%)     | 0.00<br>(0.00, 0.00) | 3                              | 0 (0.0%)     | 0.00<br>(0.00, 0.00) |                      |                  |                     |
| Any other                                 | 490        | 39 (8.0%)    | 0.38<br>(0.26, 0.50) | 491                            | 29 (5.9%)    | 0.28<br>(0.18, 0.38) | 0.72<br>(0.44, 1.16) | 0.18             |                     |

|                                                                                                                                                                            |     |               |                      |     |              |                      |                      |      |
|----------------------------------------------------------------------------------------------------------------------------------------------------------------------------|-----|---------------|----------------------|-----|--------------|----------------------|----------------------|------|
| Aerosol-generating procedures                                                                                                                                              |     |               |                      |     |              |                      |                      | 0.98 |
| Yes                                                                                                                                                                        | 410 | 33 (8.0%)     | 0.39<br>(0.26, 0.52) | 378 | 23<br>(6.1%) | 0.28<br>(0.17, 0.40) | 0.73<br>(0.43, 1.24) | 0.24 |
| No                                                                                                                                                                         | 84  | 6 (7.1%)      | 0.35<br>(0.07, 0.63) | 113 | 6<br>(5.3%)  | 0.25<br>(0.05, 0.45) | 0.72<br>(0.23, 2.22) | 0.56 |
| Overall study-drug adherence <sup>x</sup>                                                                                                                                  |     |               |                      |     |              |                      |                      | 0.57 |
| Adherent at 80% of surveys                                                                                                                                                 | 331 | 28 (8.5%)     | 0.38<br>(0.24, 0.53) | 351 | 20<br>(5.7%) | 0.25<br>(0.14, 0.36) | 0.66<br>(0.37, 1.17) | 0.16 |
| Adherent <80% of surveys                                                                                                                                                   | 133 | 11 (8.3%)     | 0.40<br>(0.16, 0.63) | 120 | 9<br>(7.5%)  | 0.35<br>(0.12, 0.58) | 0.91<br>(0.38, 2.20) | 0.83 |
| Risk Level <sup>y</sup>                                                                                                                                                    |     |               |                      |     |              |                      |                      | 0.71 |
| High                                                                                                                                                                       | 43  | 4 (9.3%)      | 0.46<br>(0.01, 0.92) | 48  | 4<br>(8.3%)  | 0.43<br>(0.01, 0.85) | 0.91<br>(0.23, 3.66) | 0.90 |
| Low                                                                                                                                                                        | 451 | 35 (7.8%)     | 0.37<br>(0.25, 0.50) | 446 | 25<br>(5.6%) | 0.26<br>(0.16, 0.36) | 0.69<br>(0.41, 1.16) | 0.16 |
| Geographic Region                                                                                                                                                          |     |               |                      |     |              |                      |                      | 0.97 |
| Northeast                                                                                                                                                                  | 87  | 6 (6.9%)      | 0.34<br>(0.07, 0.62) | 82  | 5<br>(6.1%)  | 0.28<br>(0.03, 0.53) | 0.81<br>(0.25, 2.65) | 0.73 |
| Midwest                                                                                                                                                                    | 207 | 22<br>(10.6%) | 0.50<br>(0.29, 0.71) | 216 | 13<br>(6.0%) | 0.27<br>(0.12, 0.42) | 0.54<br>(0.27, 1.07) | 0.08 |
| South                                                                                                                                                                      | 91  | 4 (4.4%)      | 0.22<br>(0.00, 0.44) | 95  | 4<br>(4.2%)  | 0.20<br>(0.00, 0.40) | 0.92<br>(0.23, 3.67) | 0.90 |
| West                                                                                                                                                                       | 56  | 5 (8.9%)      | 0.43<br>(0.05, 0.80) | 54  | 3<br>(5.6%)  | 0.27<br>(0.00, 0.57) | 0.63<br>(0.15, 2.62) | 0.52 |
| <sup>x</sup> Among those with any adherence data. Note that this is NOT a baseline subgroup. Credit was given for partial adherence to account for the twice weekly group. |     |               |                      |     |              |                      |                      |      |
| <sup>y</sup> High risk if no N95 or PAPR OR no eye protection with > 14 patient-facing hours AND performing aerosol-generating procedures                                  |     |               |                      |     |              |                      |                      |      |

**Figure S11.** Forest Plot of *A priori* Identified Subgroups, Hydroxychloroquine Once Weekly

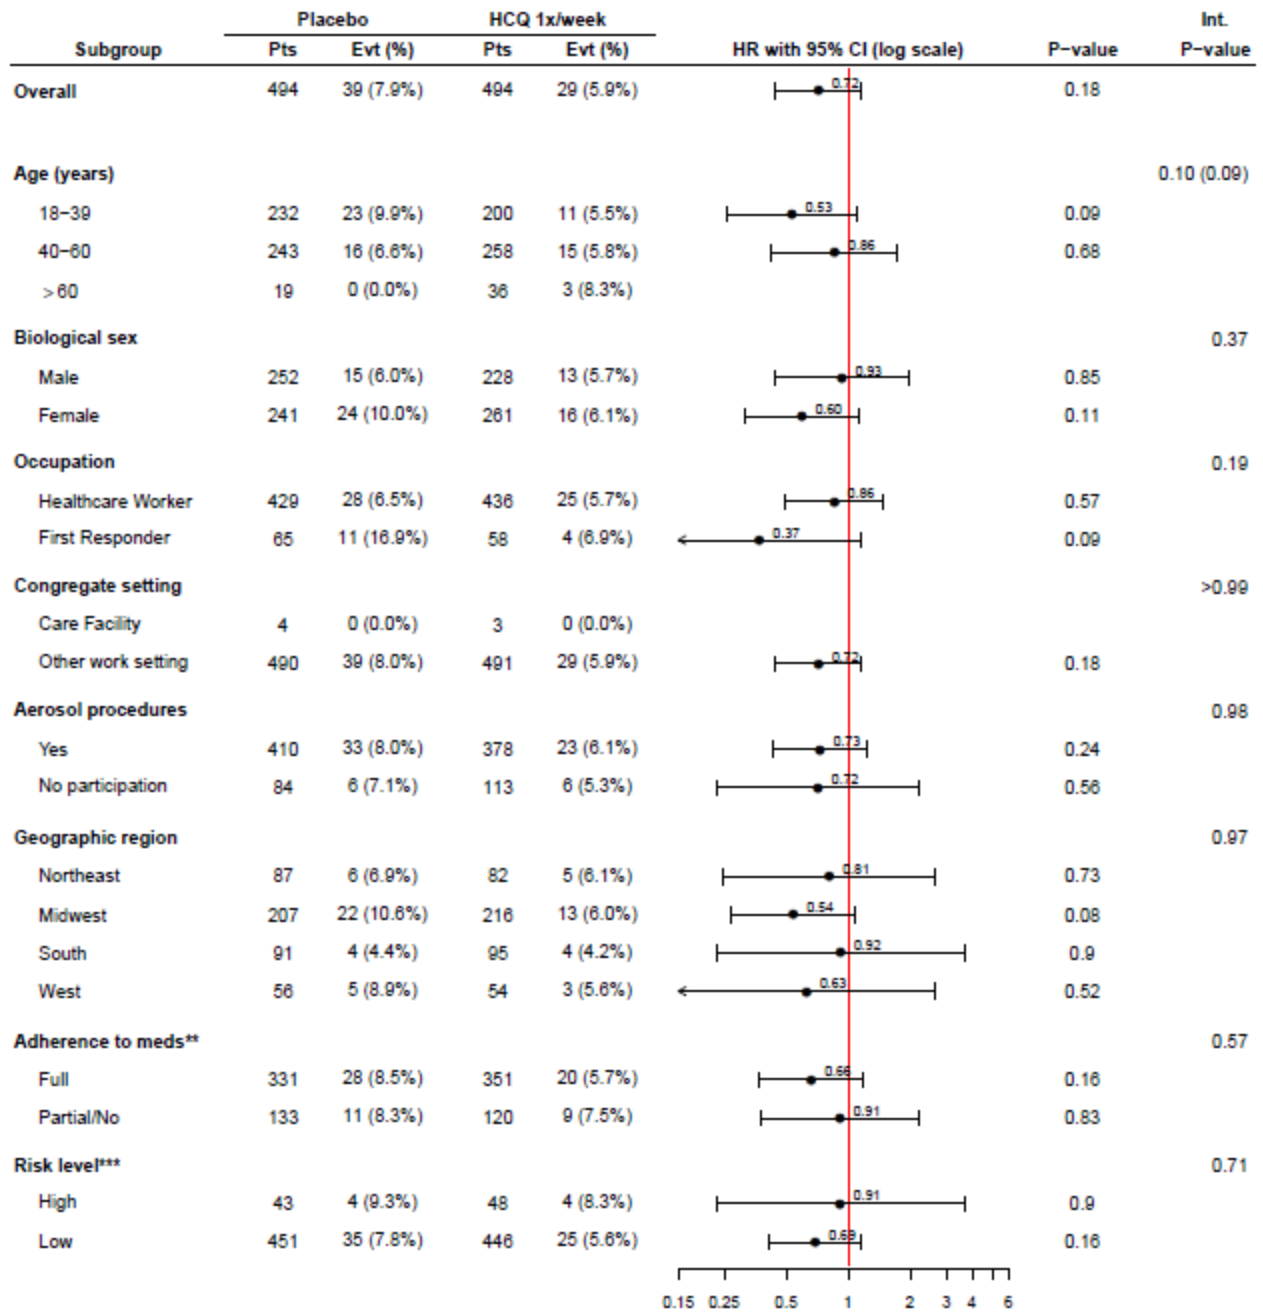

\*\* Among those with any adherence data. NOTE this is NOT a baseline subgroup. Credit was given for partial adherence to account for the twice weekly group

\*\*\* High risk if no N95 or PAPR OR no eye protection with >14 pt-facing hours, AND performing aerosol-generating procedures

**Supplemental Table 11.** Subgroup Analysis of Risk of Covid-19 Compatible Illness with Hydroxychloroquine Twice Weekly

|                                           | Placebo       |                 |                         | Hydroxychloroquine twice weekly |                 |                         | HR<br>(95% CI)       | Subgroup<br>P-value | Interaction<br>P-value |
|-------------------------------------------|---------------|-----------------|-------------------------|---------------------------------|-----------------|-------------------------|----------------------|---------------------|------------------------|
|                                           | No.<br>People | Events<br>N (%) | Rate per<br>Person Year | No.<br>People                   | Events<br>N (%) | Rate per<br>Person Year |                      |                     |                        |
| Overall N                                 | 494           |                 | 495                     |                                 |                 |                         |                      |                     |                        |
| Age, years                                |               |                 |                         |                                 |                 |                         |                      |                     | 0.09                   |
| 18-39                                     | 232           | 23<br>(9.9%)    | 0.50<br>(0.29, 0.70)    | 220                             | 12<br>(5.5%)    | 0.28<br>(0.12, 0.43)    | 0.55<br>(0.27, 1.11) | 0.10                |                        |
| 40-60                                     | 243           | 16<br>(6.6%)    | 0.31<br>(0.16, 0.46)    | 247                             | 14<br>(5.7%)    | 0.26<br>(0.12, 0.40)    | 0.85<br>(0.41, 1.74) | 0.66                |                        |
| >60                                       | 19            | 0<br>(0.0%)     | 0.00<br>(0.00, 0.00)    | 28                              | 3<br>(10.7%)    | 0.51<br>(0.00, 1.08)    |                      |                     |                        |
| Interaction p-value from continuous model |               |                 |                         |                                 |                 |                         |                      |                     | 0.04                   |
| Biologic Sex                              |               |                 |                         |                                 |                 |                         |                      |                     | 0.25                   |
| Male                                      | 252           | 15<br>(6.0%)    | 0.28<br>(0.14, 0.42)    | 235                             | 14<br>(6.0%)    | 0.28<br>(0.13, 0.43)    | 1.01<br>(0.49, 2.10) | 0.97                |                        |
| Female                                    | 241           | 24<br>(10.0%)   | 0.50<br>(0.30, 0.70)    | 258                             | 15<br>(5.8%)    | 0.28<br>(0.14, 0.43)    | 0.57<br>(0.30, 1.09) | 0.09                |                        |
| Occupation                                |               |                 |                         |                                 |                 |                         |                      |                     | 0.12                   |
| Healthcare<br>Worker                      | 429           | 28<br>(6.5%)    | 0.31<br>(0.20, 0.43)    | 438                             | 26<br>(5.9%)    | 0.28<br>(0.17, 0.39)    | 0.91<br>(0.53, 1.55) | 0.72                |                        |
| First<br>Responder                        | 65            | 11<br>(16.9%)   | 0.88<br>(0.36, 1.41)    | 57                              | 3 (5.3%)        | 0.27<br>(0.00, 0.57)    | 0.30<br>(0.08, 1.09) | 0.07                |                        |
| Setting                                   |               |                 |                         |                                 |                 |                         |                      |                     | 0.98                   |
| Congregate<br>Care Facility               | 4             | 0<br>(0.0%)     | 0.00<br>(0.00, 0.00)    | 8                               | 2<br>(25.0%)    | 1.50<br>(0.00, 3.58)    |                      |                     |                        |
| Any other                                 | 490           | 39<br>(8.0%)    | 0.38<br>(0.26, 0.50)    | 487                             | 27<br>(5.5%)    | 0.27<br>(0.17, 0.37)    | 0.69<br>(0.42, 1.13) | 0.14                |                        |
| Aerosol-generating procedures             |               |                 |                         |                                 |                 |                         |                      |                     | 0.88                   |
| Yes                                       | 410           | 33<br>(8.0%)    | 0.39<br>(0.26, 0.52)    | 377                             | 23<br>(6.1%)    | 0.29<br>(0.17, 0.42)    | 0.76<br>(0.45, 1.29) | 0.31                |                        |
| No                                        | 84            | 6<br>(7.1%)     | 0.35<br>(0.07, 0.63)    | 117                             | 6<br>(5.1%)     | 0.24<br>(0.05, 0.44)    | 0.68<br>(0.22, 2.12) | 0.51                |                        |

|                                                                                                                                                                           |     |               |                      |     |              |                      |                      |       |      |
|---------------------------------------------------------------------------------------------------------------------------------------------------------------------------|-----|---------------|----------------------|-----|--------------|----------------------|----------------------|-------|------|
| Overall study-<br>drug adherence<br><sup>x</sup>                                                                                                                          |     |               |                      |     |              |                      |                      |       | 0.61 |
| Adherent at<br>80% of surveys<br>submitted                                                                                                                                | 331 | 28<br>(8.5%)  | 0.38<br>(0.24, 0.53) | 316 | 18<br>(5.7%) | 0.26<br>(0.14, 0.38) | 0.68<br>(0.37, 1.22) | 0.19  |      |
| Adherent at<br>less than 80%<br>of surveys<br>submitted                                                                                                                   | 133 | 11<br>(8.3%)  | 0.40<br>(0.16, 0.63) | 143 | 11 (7.7%)    | 0.35<br>(0.14, 0.56) | 0.89<br>(0.38, 2.05) | 0.78  |      |
| Risk Level <sup>y</sup>                                                                                                                                                   |     |               |                      |     |              |                      |                      |       | 0.92 |
| High                                                                                                                                                                      | 43  | 4 (9.3%)      | 0.46<br>(0.01, 0.92) | 57  | 4<br>(7.0%)  | 0.36<br>(0.01, 0.72) | 0.79<br>(0.20, 3.17) | 0.71  |      |
| Low                                                                                                                                                                       | 451 | 35<br>(7.8%)  | 0.37<br>(0.25, 0.50) | 438 | 25<br>(5.7%) | 0.27<br>(0.17, 0.38) | 0.73<br>(0.44, 1.21) | 0.22  |      |
| Geographic<br>Region                                                                                                                                                      |     |               |                      |     |              |                      |                      |       | 0.43 |
| Northeast                                                                                                                                                                 | 87  | 6<br>(6.9%)   | 0.34<br>(0.07, 0.62) | 81  | 5<br>(6.2%)  | 0.29<br>(0.04, 0.55) | 0.84<br>(0.26, 2.76) | 0.78  |      |
| Midwest                                                                                                                                                                   | 207 | 22<br>(10.6%) | 0.50<br>(0.29, 0.71) | 215 | 9<br>(4.2%)  | 0.20<br>(0.07, 0.33) | 0.39<br>(0.18, 0.84) | 0.02  |      |
| South                                                                                                                                                                     | 91  | 4<br>(4.4%)   | 0.22<br>(0.00, 0.44) | 88  | 4<br>(4.5%)  | 0.23<br>(0.00, 0.46) | 1.04<br>(0.26, 4.14) | 0.96  |      |
| West                                                                                                                                                                      | 56  | 5<br>(8.9%)   | 0.43<br>(0.05, 0.80) | 67  | 6<br>(9.0%)  | 0.42<br>(0.08, 0.75) | 1.00<br>(0.31, 3.29) | >0.99 |      |
| <sup>x</sup> Among those with any adherence data. Note that this is NOT a baseline subgroup. Credit was given for partial adherence to account for the twice weekly group |     |               |                      |     |              |                      |                      |       |      |
| <sup>y</sup> High risk if no N95 or PAPR OR no eye protection with > 14 patient-facing hours, AND performing aerosol-generating procedures                                |     |               |                      |     |              |                      |                      |       |      |

Figure S12. Forest Plot of *A priori* Identified Subgroups, Hydroxychloroquine Twice Weekly

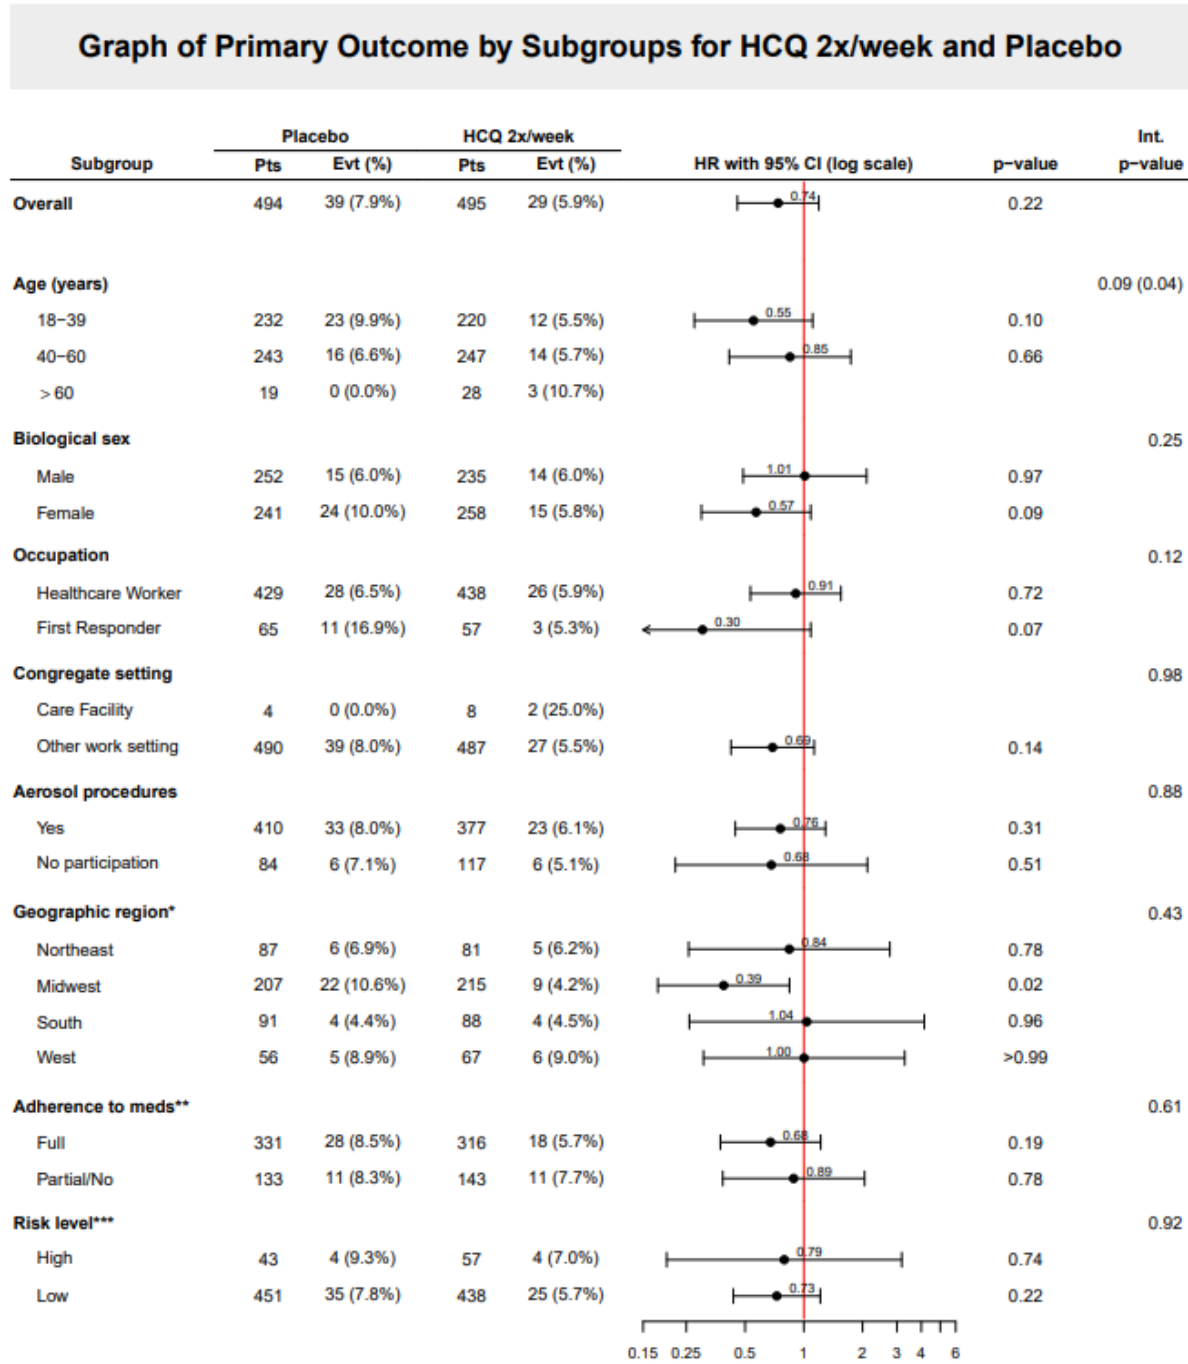

\* Regions based on Census Bureau regions and divisions

\*\* Among those with any adherence data. NOTE this is NOT a baseline subgroup. Credit was given for partial adherence to account for the twice weekly group

\*\*\* High risk if no N95 or PAPR OR no eye protection with >14 pt-facing hours, performing aerosol-generating procedures

### Sensitivity Analyses

1. Include participants who had confirmed or probable Covid-19 onset after randomization but before study medication was initiated

|                                                           | Placebo<br>(n=498) | Hydroxychloroquine<br>once weekly (n=498) | HR <sup>1</sup>        | P Value <sup>1</sup> | Hydroxychloroquine twice<br>weekly (n=500) | HR <sup>2</sup>        | P Value <sup>2</sup> |
|-----------------------------------------------------------|--------------------|-------------------------------------------|------------------------|----------------------|--------------------------------------------|------------------------|----------------------|
| PCR positive or probable Covid-19<br>or possible Covid-19 | 40 (8.0%)          | 29 (5.8%)                                 | 0.70<br>(0.43 to 1.12) | 0.14                 | 30 (6.0%)                                  | 0.74<br>(0.46 to 1.19) | 0.22                 |

<sup>1</sup> Comparing hydroxychloroquine once weekly to placebo    <sup>2</sup> Comparing hydroxychloroquine twice weekly to placebo

2. Exclude participants who had confirmed or probable Covid-19 onset after randomization but before the first weekly survey was completed

|                                                           | Placebo<br>(n=492) | Hydroxychloroquine<br>once weekly (n=492) | HR <sup>1</sup>        | P Value <sup>1</sup> | Hydroxychloroquine twice<br>weekly (n=493) | HR <sup>2</sup>        | P Value <sup>2</sup> |
|-----------------------------------------------------------|--------------------|-------------------------------------------|------------------------|----------------------|--------------------------------------------|------------------------|----------------------|
| PCR positive or probable Covid-19<br>or possible Covid-19 | 37 (7.5%)          | 27 (5.5%)                                 | 0.70<br>(0.43 to 1.16) | 0.17                 | 27 (5.5%)                                  | 0.72<br>(0.44 to 1.19) | 0.20                 |

<sup>1</sup> Comparing hydroxychloroquine once weekly to placebo    <sup>2</sup> Comparing hydroxychloroquine twice weekly to placebo

3. Primary event includes confirmed Covid-19, probable Covid-19, and possible Covid-19 (based on symptoms)

|                                                           | Placebo<br>(n=494) | Hydroxychloroquine<br>once weekly (n=494) | HR <sup>1</sup>        | P Value <sup>1</sup> | Hydroxychloroquine twice<br>weekly (n=495) | HR <sup>2</sup>        | P Value <sup>2</sup> |
|-----------------------------------------------------------|--------------------|-------------------------------------------|------------------------|----------------------|--------------------------------------------|------------------------|----------------------|
| PCR positive or probable Covid-19<br>or possible Covid-19 | 49 (9.9%)          | 40 (8.1%)                                 | 0.78<br>(0.52 to 1.19) | 0.25                 | 40 (8.1%)                                  | 0.80<br>(0.53 to 1.22) | 0.31                 |

<sup>1</sup> Comparing hydroxychloroquine once weekly to placebo    <sup>2</sup> Comparing hydroxychloroquine twice weekly to placebo

4. Exclude participants who were protocol violations

|                                                           | Placebo<br>(n=493) | Hydroxychloroquine<br>once weekly (n=490) | HR <sup>1</sup>        | P Value <sup>1</sup> | Hydroxychloroquine twice<br>weekly (n=493) | HR <sup>2</sup>        | P Value <sup>2</sup> |
|-----------------------------------------------------------|--------------------|-------------------------------------------|------------------------|----------------------|--------------------------------------------|------------------------|----------------------|
| PCR positive or probable Covid-19<br>or possible Covid-19 | 39 (7.9%)          | 29 (5.9%)                                 | 0.72<br>(0.45 to 1.17) | 0.18                 | 29 (5.9%)                                  | 0.74<br>(0.46 to 1.20) | 0.22                 |

<sup>1</sup> Comparing hydroxychloroquine once weekly to placebo <sup>2</sup> Comparing hydroxychloroquine twice weekly to placebo

5. Exclude events in participants who had PCR negative testing despite Covid-19 compatible symptoms

|                                                                     | Placebo<br>(n=494) | Hydroxychloroquine<br>once weekly (n=494) | HR <sup>1</sup>        | P Value <sup>1</sup> | Hydroxychloroquine twice<br>weekly (n=496) | HR <sup>2</sup>        | P Value <sup>2</sup> |
|---------------------------------------------------------------------|--------------------|-------------------------------------------|------------------------|----------------------|--------------------------------------------|------------------------|----------------------|
| PCR positive or probable Covid-19<br>(without negative PCR testing) | 15 (3.0%)          | 14 (2.8%)                                 | 0.90<br>(0.43 to 1.86) | 0.78                 | 20 (4.0%)                                  | 1.32<br>(0.67 to 2.57) | 0.42                 |

<sup>1</sup> Comparing hydroxychloroquine once weekly to placebo <sup>2</sup> Comparing hydroxychloroquine twice weekly to placebo

6. Exclude participants who had confirmed or probable Covid-19 before the fourth weekly survey was completed (after which steady state levels would be achieved)

|                                                                     | Placebo<br>(n=477) | Hydroxychloroquine<br>once weekly (n=479) | HR <sup>1</sup>        | P Value <sup>1</sup> | Hydroxychloroquine twice<br>weekly (n=476) | HR <sup>2</sup>        | P Value <sup>2</sup> |
|---------------------------------------------------------------------|--------------------|-------------------------------------------|------------------------|----------------------|--------------------------------------------|------------------------|----------------------|
| PCR positive or probable Covid-19<br>(without negative PCR testing) | 26 (5.5%)          | 18 (3.8%)                                 | 0.66<br>(0.36 to 1.21) | 0.18                 | 18 (3.8%)                                  | 0.69<br>(0.38 to 1.26) | 0.23                 |

<sup>1</sup> Comparing hydroxychloroquine once weekly to placebo <sup>2</sup> Comparing hydroxychloroquine twice weekly to placebo



**Supplemental Table 12.** Participant Guess of Study Arm at Completion of Study

|                            | <b>Placebo</b> | <b>Hydroxychloroquine<br/>once weekly</b> | <b>Hydroxychloroquine<br/>twice weekly</b> |
|----------------------------|----------------|-------------------------------------------|--------------------------------------------|
| N answered question        | 417            | 425                                       | 405                                        |
| Guessed hydroxychloroquine | 65 (15.6%)     | 176 (41.4%)                               | 141 (34.8%)                                |
| Guessed placebo            | 156 (37.4%)    | 54 (12.7%)                                | 61 (15.1%)                                 |
| Not sure                   | 196 (47.0%)    | 195 (45.9%)                               | 203 (50.1%)                                |

## References

1. Council of State and Territorial Epidemiologists. Interim-20-ID-01: Standardized surveillance case definition and national notification for 2019 novel coronavirus disease (COVID-19). [https://www.cste.org/resource/resmgr/2020ps/Interim-20-ID-01\\_COVID-19.pdf](https://www.cste.org/resource/resmgr/2020ps/Interim-20-ID-01_COVID-19.pdf). Published 2020. Accessed 20 April 2020.
2. Qu Y, Brady K, Apilado R, et al. Capillary blood collected on volumetric absorptive microsampling (VAMS) device for monitoring hydroxychloroquine in rheumatoid arthritis patients. *J Pharm Biomed Anal.* 2017;140:334-341.
3. Al-Kofahi M, Jacobson P, Boulware DR, et al. Finding the dose for hydroxychloroquine prophylaxis for COVID-19: The desperate search for effectiveness. *Clin Pharmacol Ther.* 2020.
4. Ruiz-Irastorza G, Ramos-Casals M, Brito-Zeron P, Khamashta MA. Clinical efficacy and side effects of antimalarials in systemic lupus erythematosus: a systematic review. *Ann Rheum Dis.* 2010;69(1):20-28.
5. Al-Bari MA. Chloroquine analogues in drug discovery: new directions of uses, mechanisms of actions and toxic manifestations from malaria to multifarious diseases. *J Antimicrob Chemother.* 2015;70(6):1608-1621.
